## **G<sub>i/o</sub> protein–coupled receptor inhibition of beta-cell electrical excitability and insulin secretion depends on Na<sup>+</sup>/K<sup>+</sup> ATPase activation**

Matthew T. Dickerson<sup>1</sup>, Prasanna K. Dadi<sup>1</sup>, Karolina E. Zaborska<sup>1</sup>, Arya Y. Nakhe<sup>1</sup>, Charles M. Schaub<sup>1</sup>, Jordyn R. Dobson<sup>1</sup>, Nicole M. Wright<sup>1</sup>, Joshua C. Lynch<sup>1</sup>, Claire F. Scott<sup>1</sup>, and David A. Jacobson<sup>1a</sup>

<sup>1</sup> Department of Molecular Physiology and Biophysics, Vanderbilt University, 7425B MRB IV, 2213 Garland Ave., Nashville, TN 37232, USA.

<sup>a</sup> Correspondence should be addressed to: David A. Jacobson.

Email: [david.a.jacobson@vanderbilt.edu](mailto:david.a.jacobson@vanderbilt.edu). Phone: (615) 875-7655.

Address: Department of Molecular Physiology and Biophysics, Vanderbilt University, 7425B MRB IV, 2213 Garland Ave., Nashville, TN, 37232-0615, USA.

The authors have declared that no conflict of interest exists.

## ABSTRACT

$G_{i/o}$  protein-coupled receptors ( $G_{i/o}$ -GPCRs) limit pancreatic islet insulin secretion by decreasing  $\beta$ -cell  $Ca^{2+}$  entry, which is essential for maintenance of glucose homeostasis. However, the  $G_{i/o}$ -GPCR signaling mechanism that mediates inhibition of human islet hormone secretion has not been identified. Here we demonstrate that  $G_{i/o}$ -GPCRs cause hyperpolarization of the  $\beta$ -cell membrane potential through activation of  $Na^+/K^+$  ATPases (NKAs) in mouse and human islets. Stimulation of  $G_{i/o}$ -coupled somatostatin or  $\alpha 2$ -adrenergic receptors induced oscillations in  $\beta$ -cell NKA activity, which resulted in islet  $Ca^{2+}$  fluctuations. Selective induction of  $\beta$ -cell  $G_{i/o}$  signaling with a chemogenetic  $G_{i/o}$ -GPCR also activated NKAs and initiated islet  $Ca^{2+}$  oscillations, suggesting that  $\beta$ -cell  $G_{i/o}$ -GPCRs tune pulsatile insulin secretion. Furthermore, intra-islet paracrine activation of  $\beta$ -cell  $G_{i/o}$ -GPCR signaling and NKAs by  $\delta$ -cell somatostatin secretion slowed  $Ca^{2+}$  oscillations, which decreased insulin secretion.  $G_{i/o}$ -GPCR-mediated oscillations in  $\beta$ -cell membrane potential and  $Ca^{2+}$  were dependent on NKA phosphorylation by Src tyrosine kinases; an effect that was mimicked by stimulating islet insulin receptor tyrosine kinases. Whereas  $\beta$ -cell NKA function was completely inhibited by cAMP-dependent PKA activation. Taken together, these data reveal that NKA-mediated hyperpolarization of  $\beta$ -cell membrane potential serves as the primary and conserved mechanism for  $G_{i/o}$ -GPCR control of electrical excitability,  $Ca^{2+}$  handling, and insulin secretion.

## INTRODUCTION

Pancreatic  $\beta$ -cell glucose-stimulated insulin secretion (GSIS) is essential for maintenance of euglycemia (1, 2), and as  $\text{Ca}^{2+}$  entry is required for GSIS, mechanisms that control  $\beta$ -cell  $\text{Ca}^{2+}$  handling are critical regulators of blood glucose homeostasis (3-7). It was discovered more than 50 years ago that  $G_{i/o}$ -coupled G protein-coupled receptors (GPCRs) play a critical role in limiting insulin secretion in-part by decreasing  $\beta$ -cell electrical excitability and subsequent  $\text{Ca}^{2+}$  influx (8-10). However, the exact mechanism(s) of  $G_{i/o}$ -coupled GPCR control of  $\beta$ -cell electrical excitability,  $\text{Ca}^{2+}$  handling, and insulin secretion remain poorly understood.

$\beta$ -cells express numerous  $G_{i/o}$ -coupled GPCRs such as somatostatin receptors (SSTRs),  $\alpha$ 2A-adrenergic receptors (ADRs), and D2-like dopamine receptors (DRDs) (11-16). Treatment with  $G_{i/o}$ -coupled GPCR ligands (i.e. somatostatin (SST), adrenaline, or dopamine) activates hyperpolarizing currents and reduces intracellular cAMP ( $[\text{cAMP}]_i$ ) levels, which results in decreased intracellular  $\text{Ca}^{2+}$  ( $[\text{Ca}^{2+}]_i$ ) and diminished insulin secretion (16-21). As insulin secretion is inhibited by  $G_{i/o}$ -coupled GPCRs, these signals are critical for preventing excessive insulin secretion under hypoglycemic as well as stimulatory conditions (22). Indeed, loss of intact  $\alpha$ 2-ADR signaling leads to a drop in blood glucose levels under fasting and fed conditions due to elevated insulin secretion (23), while ADR agonists attenuate GSIS (24, 25). Intra-islet communication is also mediated via  $G_{i/o}$  signaling (i.e. SST is secreted by  $\delta$ -cells while dopamine is secreted by  $\beta$ - and  $\alpha$ -cells) (26-30), which tunes  $\beta$ -cell  $\text{Ca}^{2+}$  handling and insulin secretion. Thus, inhibition of islet  $G_{i/o}$ -coupled GPCRs with pertussis toxin, also known as islet activating protein (31), significantly stimulates hormone secretion, highlighting the importance of  $G_{i/o}$ -coupled GPCRs in regulating islet function. As numerous  $G_{i/o}$ -coupled GPCRs control physiological  $\beta$ -cell function, perturbations in these pathways impair  $\beta$ -cell GSIS and are in some instances associated with increased risk of developing diabetes (14, 32-34). For example, glucose-stimulated SST secretion is blunted during the pathogenesis of type 2 diabetes (T2D), which diminishes SSTR-mediated control of  $\beta$ -cell function (33). Moreover, polymorphisms that

increase  $\alpha 2A$ -ADR expression result in increased risk of developing T2D due to suppression of GSIS (14, 32, 34). Taken together, these findings strongly suggest that  $G_{i/o}$  signaling plays a key role in regulating  $\beta$ -cell  $Ca^{2+}$  handling and insulin secretion; however, the underlying mechanism has not been conclusively identified for more than half a century.

$\beta$ -cell  $V_m$  hyperpolarization is predominantly mediated by  $K^+$  efflux; thus, it has been generally accepted that  $G_{i/o}$ -coupled GPCR signaling activates an outward  $K^+$  conductance. However, ATP-sensitive  $K^+$  ( $K_{ATP}$ ) channels can be ruled out as the source, because activation of  $G_{i/o}$ -coupled GPCRs induces  $\beta$ -cell  $V_m$  hyperpolarization in the presence of sulfonylureas and in  $K_{ATP}$  channel-deficient islets (21, 35). As is the case in numerous other tissues,  $G_{i/o}$  signaling-induced  $\beta$ -cell  $V_m$  hyperpolarization has been widely ascribed to activation of G protein-gated inwardly-rectifying  $K^+$  (GIRK) channels (16, 36). RNA sequencing studies show that both mouse and human  $\beta$ -cells express low levels of GIRK channel transcripts (predominantly *KCNJ6*, the gene encoding GIRK2) (11, 12, 16), and immunofluorescent staining of mouse pancreatic sections confirms expression of GIRK channel proteins in  $\beta$ -cells (36). While  $G_{i/o}$  signaling activates robust inwardly-rectifying  $K^+$  currents in other cell types where GIRK channels are expressed (37), currents with GIRK-like characteristics have not been reproducibly observed in primary  $\beta$ -cells. Moreover, there are conflicting reports detailing the effect of GIRK channel inhibitors on  $\beta$ -cell electrical activity and  $Ca^{2+}$  handling. For example, one study determined that pharmacological GIRK channel inhibition blocks adrenaline-induced  $V_m$  hyperpolarization in rat  $\beta$ -cells (36), but another manuscript found that GIRK channel inhibition does not prevent adrenaline-induced  $V_m$  hyperpolarization in mouse  $\beta$ -cells (19). Furthermore, treatment with a wide range of other  $K^+$  channel blockers failed to inhibit adrenaline-induced  $\beta$ -cell  $V_m$  hyperpolarization. These observations suggest that  $G_{i/o}$  signaling-induced  $\beta$ -cell  $V_m$  hyperpolarization not mediated by GIRK or other  $K^+$  channels.

Electrogenic  $Na^+/K^+$  ATPases (NKAs) can be activated by  $G_{i/o}$ -coupled GPCR signaling leading to  $V_m$  hyperpolarization (38, 39). NKAs preserve steep ionic gradients that are essential

for setting and maintaining  $\beta$ -cell  $V_m$  by extruding three intracellular  $\text{Na}^+$  ions in exchange for two extracellular  $\text{K}^+$  ions; this net outward cationic flux hyperpolarizes  $V_m$  (35, 38, 39). The NKA  $\alpha 1$  subunit is highly expressed in mouse and human  $\beta$ -cells, showing greater than 100x the transcript expression of the most abundant GIRK channel transcript (e.g. *KCNJ6*) (11-13). Inhibition of islet NKAs with ouabain leads to  $\beta$ -cell  $V_m$  depolarization and enhances insulin secretion (40, 41). Ouabain also blocks glucose-stimulated  $[\text{Ca}^{2+}]_i$  oscillations and decreases insulin receptor-mediated  $V_m$  hyperpolarization in  $\text{K}_{\text{ATP}}$  deficient *SUR1*<sup>-/-</sup> islets (35). Furthermore, glucose inhibits  $\beta$ -cell NKA activity through protein kinase C (PKC) and phospholipase  $\text{A}_2$  dependent pathways, which promotes  $\beta$ -cell glucose-stimulated  $\text{Ca}^{2+}$  influx and presumably GSIS (42). Moreover,  $\text{G}_{i/o}$  signaling controls the activity of several  $\beta$ -cell protein kinases known to regulate NKA function. For example, protein kinase A (PKA), which limits NKA activity, is inhibited by SSTR signaling in a cAMP-dependent manner; whereas, sarcoma (Src) tyrosine kinases augment NKA function and are activated by SSTR signaling (38, 43-47). Thus,  $\text{G}_{i/o}$ -coupled GPCRs are predicted to influence  $\beta$ -cell  $\text{Ca}^{2+}$  handling through changes in NKA  $\alpha 1$  subunit phosphorylation.

Here we show for the first time, to the best of our knowledge, that NKA-mediated  $\beta$ -cell  $V_m$  hyperpolarization is a conserved mechanism for  $\text{G}_{i/o}$ -coupled GPCR control of  $\beta$ -cell  $\text{Ca}^{2+}$  handling and insulin secretion. Activation of  $\text{G}_{i/o}$  signaling in  $\beta$ -cells generated ouabain- and  $\text{K}^+$ -sensitive outward currents as well as  $[\text{Ca}^{2+}]_i$  oscillations independently of  $\text{K}_{\text{ATP}}$  in both mouse and human  $\beta$ -cells. Inhibition of SST secretion from  $\delta$ -cells increased islet  $[\text{Ca}^{2+}]_i$ , accelerated islet  $[\text{Ca}^{2+}]_i$  oscillations, and enhanced GSIS, demonstrating the critical role of  $\delta$ -cell paracrine signaling in tuning  $\beta$ -cell  $\text{Ca}^{2+}$  handling and insulin secretion, likely through NKA activation.  $\beta$ -cell NKA function also decreased in a cAMP-dependent manner due to activation of PKA. Furthermore, stimulation of tyrosine kinase activity (Src or insulin receptors) initiated islet  $[\text{Ca}^{2+}]_i$  oscillations, which may indicate that tyrosine kinase signaling serves as a crucial mechanism for regulation of  $\beta$ -cell NKAs. Therefore, these findings illuminate a conserved mechanism for  $\text{G}_{i/o}$ -

coupled GPCR control of  $\beta$ -cell NKAs that serves a key role in regulating  $\beta$ -cell electrical excitability,  $\text{Ca}^{2+}$  handling, and insulin secretion.

## RESULTS

### SSTR signaling activates GIRK channel-independent outward currents

It is generally accepted that  $\beta$ -cell  $G_{i/o}$  signaling activates hyperpolarizing GIRK channels (16, 36); however, measurement of  $\beta$ -cell GIRK currents has proven difficult utilizing traditional voltage-clamp recording techniques. Thus, we employed a modified recording paradigm to elicit quantifiable SST-induced  $\beta$ -cell currents. SST-mediated changes in  $\beta$ -cell  $V_m$  were monitored in intact islets and whole-cell currents were recorded in response to voltage ramps before and after each treatment. In C57 control islets stimulated with 20mM glucose and 1mM tolbutamide, SST induced outward currents with little rectification (current amplitude at -50mV:  $15.7 \pm 1.9$  pA; Fig. 1A-1C;  $P < 0.0001$ ); SST also hyperpolarized  $V_m$  ( $-30.2 \pm 3.5$  mV; Fig. 1A and 1D;  $P < 0.0001$ ). As transcriptome studies indicate that *Kcnj6* is the most abundant GIRK channel transcript (11-13), GIRK2 deficient (GIRK2  $\text{KO}^{\text{Panc}}$ ) islets were utilized to determine the contribution of GIRK2 channels to SST-induced  $\beta$ -cell currents. SST treatment elicited similar outward non-rectifying currents in  $\beta$ -cells without GIRK2 channels (current amplitude at -50mV:  $17.6 \pm 2.0$  pA; Fig. 1E and 1F;  $P < 0.0001$ ) and hyperpolarized  $V_m$  ( $-23.2 \pm 2.6$  mV; Fig. 1G;  $P < 0.01$ ). Moreover, SST triggered  $[\text{Ca}^{2+}]_i$  oscillations in  $95.3 \pm 2.4\%$  of islets without GIRK2 channels, which was indistinguishable from control islets ( $94.7 \pm 4.8\%$ ; Fig. 1H and 1I), and reduced  $[\text{Ca}^{2+}]_i$  plateau fraction by  $32.6 \pm 4.2\%$  compared to before treatment (Fig. 1H and 1J;  $P < 0.01$ ). GIRK channels were also pharmacologically inhibited with 200nM tertiapin-Q to confirm GIRK channel-independent SST-induced  $\beta$ -cell currents. In the presence of tertiapin-Q, SST elicited outward currents with minimal inward rectification in control  $\beta$ -cells (max at -50mV:  $12.4 \pm 1.8$  pA; Fig. 1K-1M;  $P < 0.0001$ ) and hyperpolarized  $V_m$  ( $-25.2 \pm 6.7$  mV; Fig. 1N;  $P < 0.001$ ). Furthermore,  $76.8 \pm 10.5\%$  of control islets treated with tertiapin-Q subsequent to SST continued to oscillate, which was not significantly

different than with SST alone ( $92.8 \pm 7.3\%$ ; Fig. 1O and 1P). However, tertiapin-Q treatment after SST did modestly increase islet  $[Ca^{2+}]_i$  plateau fraction by  $13.7 \pm 4.8\%$  (Fig. 1O and 1Q;  $P < 0.05$ ). These data demonstrate that SST-induced outward  $\beta$ -cell currents, which hyperpolarize  $V_m$  are largely independent of GIRK channel activity.

### **SSTR signaling induces islet $[Ca^{2+}]_i$ oscillations by stimulating $\beta$ -cell NKA activity**

SST stimulated outward currents below the equilibrium potential of  $K^+$ , which indicates that SST-induced  $\beta$ -cell currents are not mediated by  $K^+$  channels (Fig. 1C, 1F, and 1M). This suggests that SST-induced outward currents are due to efflux of another cation such as  $Na^+$ , which requires movement against the ion concentration gradient through energy-dependent ion pumps. Therefore, we investigated whether  $G_{i/o}$  signaling decreases  $\beta$ -cell  $[Ca^{2+}]_i$  by facilitating  $Na^+$  efflux through electrogenic NKAs. SST-induced  $[Ca^{2+}]_i$  oscillations stopped in  $97.1 \pm 2.9\%$  of islets following NKA inhibition with  $150 \mu M$  ouabain (Fig. 2A-2C;  $P < 0.001$ ). SST treatment also significantly decreased islet  $[Ca^{2+}]_i$  plateau fraction with ( $54.8 \pm 5.8\%$  decrease; Fig. 2D;  $P < 0.0001$ ) and without  $K_{ATP}$  inhibition ( $76.4 \pm 6.4\%$  decrease; Fig. 2D;  $P < 0.0001$ ). Importantly,  $K_{ATP}$  activation with  $125 \mu M$  diazoxide during NKA inhibition decreased  $\beta$ -cell  $[Ca^{2+}]_i$  by  $82.5 \pm 15.7\%$  (Fig. 2E and Fig. S1;  $P < 0.01$ ), which reinforces that SST-induced  $[Ca^{2+}]_i$  oscillations are not due to activation of a  $K^+$  conductance. As NKA function is regulated by cAMP-dependent signaling pathways (38, 39), we also measured mouse islet  $[cAMP]_i$  along with  $[Ca^{2+}]_i$  (Fig. 2A and 2B). Cross-correlation analysis of SST-mediated islet  $[Ca^{2+}]_i$  and  $[cAMP]_i$  oscillations revealed a strong negative correlation between the two (Fig. 2F; max correlation coefficient:  $-0.46 \pm 0.02$ ) with  $[Ca^{2+}]_i$  oscillations preceding  $[cAMP]_i$  oscillations by approximately 100ms. However,  $[cAMP]_i$  only modestly decreased following SST treatment indicating that changes in  $[cAMP]_i$  are not responsible for SST activation of  $\beta$ -cell NKAs. The importance of SST-induced NKA activity to  $\beta$ -cell  $Ca^{2+}$  handling was confirmed by removing extracellular  $K^+$ , which is required for NKA function. Following removal of extracellular  $K^+$  SST-induced  $[Ca^{2+}]_i$  oscillations ceased in  $96.1 \pm 1.9\%$  of

islets (Fig. 1C and 1G;  $P < 0.0001$ );  $K^+$  supplementation rapidly restored  $[Ca^{2+}]_i$  oscillations (Fig. 1F). Finally, we confirmed that SST does not induce  $\beta$ -cell currents or hyperpolarize  $V_m$  in the absence of extracellular  $K^+$  utilizing patch-clamp electrophysiology (Fig. 1H-1K). Taken together, these findings establish that SST-induced NKA activation decreases  $\beta$ -cell  $[Ca^{2+}]_i$ . Moreover, our results show that  $G_{i/o}$ -coupled GPCR signaling induces oscillations in both  $[Ca^{2+}]_i$  and  $[cAMP]_i$ , which likely results from oscillations in NKA activity.

NKA activity would be predicted to maintain low  $\beta$ -cell  $[Na^+]_i$ , therefore, we simultaneously measured islet  $[Na^+]_i$  along with  $[Ca^{2+}]_i$ . Cross-correlation analysis of SST-induced islet  $[Na^+]_i$  and  $[Ca^{2+}]_i$  oscillations in the presence of 20mM glucose and 1mM tolbutamide demonstrated that changes in islet  $[Na^+]_i$  closely follow  $[Ca^{2+}]_i$  (Fig. 3A and 3B; max correlation coefficient:  $0.67 \pm 0.8$ ). Interestingly, there was also a strong cross-correlation between islet  $[Na^+]_i$  and  $[Ca^{2+}]_i$  during glucose-stimulated  $[Ca^{2+}]_i$  oscillations at 9mM glucose (Fig. 3C and 3D; max correlation coefficient:  $0.75 \pm 0.11$ ), which suggests that NKA regulation of  $\beta$ -cell  $Ca^{2+}$  handling is not restricted to  $G_{i/o}$  signaling. Moreover, as islet  $[Na^+]_i$  oscillates in response to SST, this indicates that SSTR regulation of  $\beta$ -cell NKA function is also oscillatory.

It is established that elevations in  $[cAMP]_i$  inhibit NKA activity and we observed a correlation between increasing  $[cAMP]_i$  and termination of SST-induced islet  $[Ca^{2+}]_i$  oscillations. Thus, we utilized forskolin to increase islet  $[cAMP]_i$  and measured changes in SST-induced  $\beta$ -cell NKA activity. Treatment with 5 $\mu$ M forskolin blocked SST-induced  $\beta$ -cell NKA currents and prevented  $V_m$  hyperpolarization (Fig. 3E-3H). Furthermore, SST-induced  $[Ca^{2+}]_i$  oscillations persisted in only  $15.3 \pm 6.2\%$  of islets following forskolin treatment compared with SST alone ( $84.8 \pm 6.2\%$  decrease; Fig. 3I and 3J;  $P < 0.0001$ ); after forskolin treatment  $[Ca^{2+}]_i$  plateau fraction also increased by  $40.5 \pm 2.9\%$  compared to with SST alone (Fig. 3I and 3K;  $P < 0.0001$ ). These results show that cAMP blocks SST-induced islet  $[Ca^{2+}]_i$  oscillations by inhibiting  $\beta$ -cell NKA activity.



### **NKA activation is a conserved mechanism for $G_{i/o}$ -coupled GPCR control of $\beta$ -cell $[Ca^{2+}]_i$**

$\beta$ -cells express a number of  $G_{i/o}$ -coupled GPCRs in addition to SSTRs including  $\alpha_2A$  ADRs and D2-like DRDs (11-15). Thus, we examined whether  $\beta$ -cell NKA activation is a conserved mechanism for  $G_{i/o}$  signaling-mediated control of islet  $[Ca^{2+}]_i$ . Islets stimulated with 20mM glucose and 1mM tolbutamide did not oscillate, whereas all islets treated with the  $\alpha$ -ADR activator clonidine (200nM) exhibited  $[Ca^{2+}]_i$  oscillations (Fig 4A and 4B;  $P<0.0001$ ) and a  $64.0\pm 3.3\%$  decrease in  $[Ca^{2+}]_i$  plateau fraction (Fig. 4A-4C;  $P<0.0001$ ). Treatment with ouabain terminated clonidine-induced  $[Ca^{2+}]_i$  oscillations in  $94.9\pm 3.0\%$  of islets (Fig. 4A and 4B;  $P<0.0001$ ) and increased  $[Ca^{2+}]_i$  plateau fraction by  $61.1\pm 3.4\%$  (Fig. 4A and 4C;  $P<0.0001$ ), which was indistinguishable from islets before clonidine treatment. These findings indicate that stimulation of NKA activity is a conserved mechanism for  $G_{i/o}$ -coupled GPCR control of  $\beta$ -cell  $[Ca^{2+}]_i$ .

SSTRs and ADRs have also been shown to control  $\alpha$ -cell function (16, 48, 49), which is predicted to impact  $\beta$ -cell  $Ca^{2+}$  handling. Therefore,  $G_{i/o}$ -coupled DREADDS driven by an optimized RIP were employed to selectively activate  $G_{i/o}$  signaling in  $\beta$ -cells (Fig. 4D). Islets displayed no  $[Ca^{2+}]_i$  oscillations in the presence of 20mM glucose and 1mM tolbutamide; however, following treatment with 10 $\mu$ M CNO  $[Ca^{2+}]_i$  oscillations were observed in  $88.5\pm 9.0\%$  of islets (Fig. 4D and 4E) and  $[Ca^{2+}]_i$  plateau fraction decreased  $36.3\pm\%$  (Fig. 4D and 4F;  $P<0.0001$ ). Interestingly, only a small subset of  $\beta$ -cells expressed  $G_{i/o}$ -coupled DREADDS in each islet (based on mCherry fluorescence), suggesting that electrical coupling between  $\beta$ -cells amplifies  $G_{i/o}$  signaling-induced NKA activation. Following ouabain treatment,  $[Ca^{2+}]_i$  oscillations ceased in  $93.4\pm 4.3\%$  of islets (Fig. 4D and 4E;  $P<0.01$ ) and  $[Ca^{2+}]_i$  plateau fraction increased  $35.7\pm 1.8\%$  (Fig. 4D and 4F,  $P<0.0001$ ), which was indistinguishable from islets before CNO treatment. These data confirm that direct stimulation of  $\beta$ -cell  $G_{i/o}$  signaling initiates islet  $[Ca^{2+}]_i$  oscillations.

We next sought to determine if endogenous islet SST controls  $[Ca^{2+}]_i$  oscillations; this was accomplished utilizing islets from mice selectively expressing  $G_{i/o}$ -coupled DREADDs in  $\delta$ -cells ( $\delta G_i$ -DREADDs) to inhibit SST secretion during glucose-stimulated  $[Ca^{2+}]_i$  oscillations. Activation

of  $\delta$ -cell  $G_{i/o}$  signaling with CNO under stimulatory (9mM) glucose conditions decreased the period of  $[Ca^{2+}]_i$  oscillations by  $41.7 \pm 7.7\%$  (Fig. 4G and 4H;  $P < 0.01$ ) and increased  $[Ca^{2+}]_i$  area under the curve (AUC) by  $68.8 \pm 18.3\%$  (Fig. 4G and 4I;  $P < 0.01$ ) relative to before CNO treatment. This effect was reversed following treatment with exogenous SST (Fig. 4G-4I);  $[Ca^{2+}]_i$  oscillation period increased by  $74.1 \pm 20.4\%$  (Fig. 4G and 4H;  $P < 0.001$ ) and  $[Ca^{2+}]_i$  AUC decreased by  $54.0 \pm 19.8\%$  (Fig. 4G and 4I;  $P < 0.05$ ). As stimulation of  $\delta$ -cell  $G_{i/o}$  signaling enhanced  $\beta$ -cell  $Ca^{2+}$  influx and accelerated  $[Ca^{2+}]_i$  oscillation frequency, we examined the effect of  $\delta$ -cell  $G_{i/o}$ -coupled GPCR activation on SST and insulin secretion. CNO activation of  $\delta G_i$ -DREADDs had no effect on insulin secretion under low (2mM) or basal (7mM) glucose conditions; however, under stimulatory (9mM) glucose conditions  $\delta$ -cell  $G_{i/o}$  signaling increased insulin secretion from  $81.5 \pm 7.7$  to  $352.2 \pm 59.4$  pg insulin  $\cdot$  hr $^{-1}$   $\cdot$  islet $^{-1}$  (Fig. 4J;  $P < 0.0001$ ). Importantly, under identical conditions  $\delta G_i$ -DREADD activation decreased SST secretion from  $0.743 \pm 0.082$  to  $0.267 \pm 0.003$  pg SST  $\cdot$  hr $^{-1}$   $\cdot$  islet $^{-1}$  (Fig. 4K;  $P < 0.01$ ). Insulin secretion from control islets was not affected by CNO at either low (1mM) or stimulatory (11mM) glucose conditions (Fig. 4L). These findings show that  $\delta$ -cell SST secretion regulates islet  $Ca^{2+}$  handling and insulin secretion under physiological conditions. The data also suggest that SSTR-mediated activation of  $\beta$ -cell NKAs decelerates glucose-stimulated  $[Ca^{2+}]_i$  oscillations and resulting pulsatile insulin secretion.

### **$G_{i/o}$ -coupled GPCRs control human islet $Ca^{2+}$ handling by increasing $\beta$ -cell NKA activity**

As SSTR signaling hyperpolarizes human  $\beta$ -cell  $V_m$  and inhibits voltage-dependent  $Ca^{2+}$  channel activity (16), we went on to examine the mechanisms responsible. A GCaMP6s genetically encoded  $[Ca^{2+}]_i$  indicator driven by an optimized RIP was utilized to examine SSTR control of human  $\beta$ -cell  $[Ca^{2+}]_i$  (50). Treatment with exogenous SST (400nM) during stimulatory (7mM) glucose conditions decreased  $\beta$ -cell  $[Ca^{2+}]_i$  AUC by  $37.2 \pm 0.8\%$  (Fig. 4M and 4N;  $P < 0.05$ ) and  $[Ca^{2+}]_i$  plateau fraction by  $36.4 \pm 2.9\%$  (Fig. 4M and 4O;  $P < 0.01$ ). These results strongly indicate that  $G_{i/o}$  signaling regulates  $\beta$ -cell  $[Ca^{2+}]_i$  in human islets.

Transcriptional analysis shows that human  $\beta$ -cells express high levels of *ATP1A1* transcript (gene encoding the NKA  $\alpha 1$  subunit) (11-13). Indeed, immunofluorescence staining of human pancreatic sections confirmed that insulin positive  $\beta$ -cells stain positive for NKA  $\alpha 1$ , and revealed that the protein is predominantly restricted to cell membranes (Fig. 5A). Interestingly, other islet cells stained positive for NKA  $\alpha 1$ , which may indicate that NKA serves additional roles in pancreatic  $\alpha$ - and/or  $\delta$ -cells.

We next set out to determine whether  $G_{i/o}$ -coupled GPCR signaling controls human  $\beta$ -cell  $[Ca^{2+}]_i$  by augmenting NKA function. In human islets stimulated with 20mM glucose and 1mM tolbutamide, SST transiently decreased human islet  $[Ca^{2+}]_i$  by  $9.7 \pm 1.9\%$  and reduced  $[Ca^{2+}]_i$  AUC by  $7.1 \pm 2.0\%$  (Fig. 5B-5D). The effect of SST was greatly attenuated when extracellular  $K^+$  was excluded; SST-induced decreases in islet  $[Ca^{2+}]_i$  were  $3.6 \pm 0.3$  fold lower and reductions in islet  $[Ca^{2+}]_i$  AUC were  $5.1 \pm 0.4$  fold lower (Fig. 5B-5D;  $P < 0.05$ ). SST also hyperpolarized  $\beta$ -cell  $V_m$  from  $-56.8 \pm 2.8$  to  $-69.7 \pm 4.1$  mV ( $P < 0.01$ ) and activated outward currents (current amplitude at  $-100$  mV:  $2.0 \pm 0.2$  pA; Fig. 5E-5I;  $P < 0.0001$ ). Importantly, SST-induced human  $\beta$ -cell currents were outward at voltages below the equilibrium potential of  $K^+$ , which suggests  $Na^+$  movement through NKAs. Indeed, SST-induced  $\beta$ -cell currents disappeared when  $K^+$  was removed from the bath solution. Taken together, these data indicate that SSTR signaling, and presumably  $G_{i/o}$  signaling in general, increases human  $\beta$ -cell NKA activity resulting in  $V_m$  hyperpolarization and decreased  $[Ca^{2+}]_i$ .

### **$\beta$ -cell NKA activity is regulated by PKA and tyrosine kinase signaling**

Forskolin-mediated elevations in  $[cAMP]_i$  influence  $\beta$ -cell function by stimulating PKA signaling (51, 52), which has been shown to decrease NKA activity (38, 39, 46); thus, PKA was pharmacologically blocked with H89 to investigate its role in  $G_{i/o}$ -coupled GPCR control of  $\beta$ -cell electrical activity and  $Ca^{2+}$  handling. Treatment with  $10 \mu M$  H89 terminated SST-induced  $[Ca^{2+}]_i$  oscillations (Fig. 6A), reduced islet  $[Ca^{2+}]_i$  AUC by  $84.7 \pm 3.6\%$  (Fig. 6A and 6B;  $P < 0.001$ ), and decreased  $[Ca^{2+}]_i$  plateau fraction by  $99.5 \pm 0.3\%$  (Fig. 6A and 6C;  $P < 0.0001$ ) compared to SST

alone. Furthermore, H89 abolished forskolin-mediated increases in islet  $[Ca^{2+}]_i$  AUC (Fig. 6A and 6B) as well as  $[Ca^{2+}]_i$  plateau fraction (Fig. 6A and 6C). These data demonstrate that PKA serves as a negative regulator of NKA function in  $\beta$ -cells; however, as  $[cAMP]_i$  decreased only modestly in response to SST it is unlikely that a reduction in PKA activity accounts for initiation of SST-induced islet  $[Ca^{2+}]_i$  oscillations.

It has been shown that SSTR signaling stimulates Src activity (43), which interacts with and enhances NKA function (44, 45, 47). Therefore, a Src inhibitor dasatinib was employed to investigate the role of Src signaling in  $G_{i/o}$ -coupled GPCR control of  $\beta$ -cell NKA function. All islets displayed SST-induced  $[Ca^{2+}]_i$  oscillations, which decreased to  $37.6 \pm 9.8\%$  of islets in the presence of 100nM dasatinib (Fig. 6D and 6E;  $P < 0.01$ ). Dasatinib also increased islet  $[Ca^{2+}]_i$  plateau fraction by  $40.7 \pm 3.1\%$  compared to SST alone (Fig. 6D and 6F;  $P < 0.001$ ). Interestingly, the average area of islets that oscillated in the presence of dasatinib was  $71.0 \pm 8.6\%$  larger than islets that stopped oscillating ( $P < 0.01$ ). This may indicate that bifurcated islet  $Ca^{2+}$  responses are due in-part to poor penetration of dasatinib into larger islets. As SSTR signaling activates Src homology region 2 domain-containing phosphatase-2 (Shp2) that in turn stimulates Src function, a Shp2 inhibitor NSC 87877 was utilized to assess whether this pathway regulates  $\beta$ -cell NKAs. Treatment with 5 $\mu$ M NSC 87877 decreased the percentage of islets displaying SST-induced  $[Ca^{2+}]_i$  oscillations from 100% to  $53.5 \pm 6.1\%$  (Fig. 6G and 6H;  $P < 0.01$ ); islet  $[Ca^{2+}]_i$  plateau fraction also increased by  $39.9 \pm 6.8\%$  compared to SST alone (Fig. 6G and 6I;  $P < 0.01$ ). As with dasatinib treatment, the average area of islets that continued oscillating with NSC 87877 was  $75.7 \pm 16.7\%$  larger than islets that stopped oscillating ( $P < 0.05$ ), which again suggests only partial Shp2 inhibition in larger islets.

Insulin receptor signaling also stimulates Src signaling as well as NKA activity (35, 53). Therefore, we examined whether insulin regulates  $\beta$ -cell NKA function through Src activation. In the presence of 20mM glucose and 1mM tolbutamide exogenous insulin (1 $\mu$ M) induced  $[Ca^{2+}]_i$  oscillations in  $69.5 \pm 10.4\%$  of islets (Fig. 6J and 6K) and decreased islet  $[Ca^{2+}]_i$  plateau fraction by

16.4±2.6% (Fig. 6J and 6L;  $P<0.01$ ), which was comparable to the effect of SST. Subsequent addition of dasatinib had no effect on the percentage of islets displaying insulin-induced  $[Ca^{2+}]_i$  oscillations (58.6±18.6%; Fig. 6J and 6K). Dasatinib treatment did increase islet  $[Ca^{2+}]_i$  plateau fraction by 6.9±4.0% compared to insulin alone; however, the change was not significant (Fig. 6J and 6L). These results suggest that  $\beta$ -cell NKA function is augmented by insulin receptor signaling, but that this effect is likely not mediated by Src. Furthermore, these findings again suggest that once initiated  $\beta$ -cell NKA function is oscillatory in nature, independent of the mechanism of activation.

Phosphorylation of the NKA  $\alpha 1$  subunit by tyrosine kinases has been shown to regulate pump activity (46, 54, 55). Thus, to elucidate the mechanism underlying tyrosine kinase control of  $\beta$ -cell NKA function, mouse islets were treated with SST, insulin, or vehicle; cell lysates were then immunoblotted for total NKA  $\alpha 1$  protein as well as for NKA  $\alpha 1$  phosphorylated at two putative tyrosine kinase phosphorylation sites (tyrosine 10 (Y10) and tyrosine 260 (Y260)) (46, 54, 56). Phosphorylation of NKA  $\alpha 1$  at residue Y10 (p-ATP1A1<sup>Y10</sup>) increased following treatment with SST (1.8-fold increase) and insulin (1.7-fold increase), whereas phosphorylation of NKA  $\alpha 1$  at residue Y260 (p-ATP1A1<sup>Y260</sup>) was unaffected (Fig. 6M). As previous studies have shown that phosphorylation of NKA  $\alpha 1$  at residue Y10 increases NKA activity (55), this result suggests that tyrosine kinases augment  $\beta$ -cell NKA function in-part through direct phosphorylation of the NKA  $\alpha 1$  subunit.

## DISCUSSION

Islet  $G_{i/o}$ -coupled GPCR signaling modulates  $\beta$ -cell  $[Ca^{2+}]_i$  oscillations, which in turn regulates pulsatile insulin secretion (6, 18, 21). Here, we elucidate the mechanistic underpinnings of  $\beta$ -cell  $G_{i/o}$  signaling-induced  $V_m$  hyperpolarization. We found that  $G_{i/o}$  signaling activates  $\beta$ -cell NKAs, which controls the frequency of islet  $[Ca^{2+}]_i$  oscillations and initiates  $[Ca^{2+}]_i$  oscillations independently of  $K_{ATP}$  channel activity. Furthermore, Src activation was required for  $G_{i/o}$  signaling-

induced stimulation of  $\beta$ -cell NKAs; however, NKA-mediated  $V_m$  hyperpolarization was also inhibited by cAMP-dependent PKA activation, indicating that multiple signaling modalities converge to control NKA function and thus islet  $[Ca^{2+}]_i$  handling. Therefore, these results demonstrate the importance of  $\delta$ -cell SST secretion in controlling islet  $[Ca^{2+}]_i$  oscillations through SSTR-mediated regulation of  $\beta$ -cell NKA activity. Moreover, we have identified a conserved mechanism for  $G_{i/o}$ -coupled GPCR control of  $\beta$ -cell NKA function that extends to ADRs and DRDs. Therefore, the data reveal that  $G_{i/o}$ -coupled GPCR control of  $\beta$ -cell NKA activity plays a critical role in tuning the frequency of islet  $[Ca^{2+}]_i$  oscillations, and thus the kinetics of insulin secretion.

Activation of GIRK channels accounts for  $G_{i/o}$  signaling-induced  $V_m$  hyperpolarization in many tissues (37); this has also been proposed for  $\beta$ -cells (16, 36). However, biophysical evidence of  $\beta$ -cell GIRK channel activation through  $G_{i/o}$ -coupled GPCR signaling is limited. Indeed, elegant studies by Sieg et al. demonstrated that GIRK channels are not activated by ADR stimulation (19). We also found no evidence of an SSTR-mediated GIRK conductance in mouse or human  $\beta$ -cells. Moreover, SST-activated currents were outward at voltages below the equilibrium potential of  $K^+$ , were present in  $\beta$ -cells without GIRK2 channels, and were not inhibited by tertiapin-Q. Nevertheless, as GIRK channels are expressed in  $\beta$ -cells and SST-induced currents trended lower in the presence of tertiapin-Q, a role for these channels cannot be completely discounted. However, the primary mechanism responsible for  $G_{i/o}$  signaling-induced inhibition of insulin secretion has remained elusive for more than 50 years. As many studies have shown that  $G_{i/o}$  signaling hyperpolarizes  $\beta$ -cell  $V_m$  (16, 18, 19, 36), it was assumed that a  $G_{i/o}$ -coupled GPCR activates a  $K^+$  channel. To enhance  $K^+$  currents through this putative channel,  $K^+$  was removed from the extracellular solution, but surprisingly, SST-induced  $\beta$ -cell currents and  $V_m$  hyperpolarization were both abolished. Interestingly, in the absence of extracellular  $K^+$ , diazoxide was still able to mediate a decrease in islet  $[Ca^{2+}]_i$ , which suggested that SST-induced  $V_m$  hyperpolarization was not due to a  $K^+$  current. As  $G_{i/o}$ -coupled GPCR signaling activates NKAs in other tissues and removal of extracellular  $K^+$  inhibits NKA activity, we considered NKAs a strong

candidate to explain SST-induced  $\beta$ -cell  $V_m$  hyperpolarization (38, 40). This was confirmed using the NKA inhibitor ouabain, which blocked SST-induced reductions of islet  $[Ca^{2+}]_i$ . Furthermore, epinephrine and dopamine have been shown to hyperpolarize  $\beta$ -cell  $V_m$  and stimulate NKAs in certain tissues (8-10, 16, 18, 38), and indeed, our data confirmed that  $\alpha$ 2A-adrenergic signaling regulates  $\beta$ -cell  $[Ca^{2+}]_i$  by activating NKAs. Taken together, these results suggest that activation of NKAs rather than  $K^+$  channels serves as a conserved mechanism for  $G_{i/o}$  signaling-mediated  $\beta$ -cell  $V_m$  hyperpolarization.

The mechanisms underlying  $G_{i/o}$ -coupled GPCR control of NKA activity are highly tissue-specific, but are predominantly linked to the phosphorylation status of the NKA  $\alpha$  subunit (38, 39, 46). Our data support previous findings showing that  $G_{i/o}$  signaling-induced islet  $[Ca^{2+}]_i$  oscillations can be terminated by stimulating adenylyl cyclase activity, inhibiting phosphodiesterase activity, or directly raising  $[cAMP]_i$  (21); this suggests that phosphorylation by cAMP-dependent kinases inhibits  $\beta$ -cell NKAs. Furthermore, as both glucose metabolism and  $G_s$ -coupled GPCR signaling increase  $\beta$ -cell  $[cAMP]_i$  levels (52, 57-60), this signal would be predicted to dynamically regulate NKA activity and thus  $Ca^{2+}$  handling. Indeed, several minutes after SST treatment we observed robust  $[cAMP]_i$  oscillations that were out of phase with  $[Ca^{2+}]_i$  oscillations. Pharmacological blockade of PKA signaling also decreased islet  $[Ca^{2+}]_i$  and prevented forskolin-mediated inhibition of  $\beta$ -cell NKAs. Therefore, these findings suggest that  $G_{i/o}$  signaling-induced fluctuations in islet  $[cAMP]_i$  influence oscillations in  $\beta$ -cell NKA activity. While PKA is the primary cAMP-regulated  $\beta$ -cell kinase, additional kinases that modulate NKA function (i.e. PKC, EPAC, PKG) could also be impacted by changes in  $[cAMP]_i$  (61-65). Thus, future studies are required to further determine how  $[cAMP]_i$  tunes NKA activity not only via  $G_{i/o}$ -coupled GPCR signaling, but also through pathways that increase  $[cAMP]_i$  such as glucose metabolism and  $G_s$ -coupled GPCRs.

Although islet  $[cAMP]_i$  oscillations were observed subsequent to  $[Ca^{2+}]_i$  oscillations, SST treatment caused only a very modest initial reduction in islet  $[cAMP]_i$ ; this suggests that cAMP is not the principal signal controlling  $G_{i/o}$ -coupled GPCR-induced islet  $[Ca^{2+}]_i$  oscillations. While

cAMP-dependent changes in PKA activity modulate  $\beta$ -cell NKA function,  $G_{i/o}$ -coupled GPCRs also stimulate cAMP-independent protein kinases that have been shown to influence NKA activity. For example, the tyrosine kinase Src and the tyrosine phosphatase Shp2, which activates Src, interact with SSTRs and are activated by SSTR signaling (43, 66). Moreover, Src also interacts with and augments NKA activity (44, 47). As Src and Shp2 inhibition greatly diminished NKA-mediated decreases of islet  $[Ca^{2+}]_i$ , SST-induced Src signaling is predicted to facilitate activation of  $\beta$ -cell NKAs. Interestingly, the Src inhibitor used in these studies, dasatinib, which is FDA approved for the treatment of Philadelphia chromosome–positive chronic myeloid leukemia, has been shown to decrease blood glucose levels in numerous clinical studies, most prominently in diabetic patients (67-69). This suggests the possibility that dasatinib increases human islet insulin secretion by inhibiting NKAs, and thus enhancing glucose-mediated  $Ca^{2+}$  entry. Insulin receptors that interact with and control Src signaling are also tyrosine kinases and have been shown to stimulate NKAs in a variety of tissues (35, 53, 70). Our findings confirmed that insulin enhances  $\beta$ -cell NKA function; however, insulin-induced islet  $[Ca^{2+}]_i$  oscillations were only modestly affected by dasatinib treatment. This indicates that insulin stimulates  $\beta$ -cell NKAs independently of Src signaling, presumably through direct phosphorylation of NKA  $\alpha 1$  subunits. Both insulin and Src have been shown to phosphorylate NKA  $\alpha 1$  at residue Y10, which augments NKA function (46, 55, 56). This is supported by the finding that phosphorylation of NKA  $\alpha 1$  residue Y10 increases in islets following treatment with SST or insulin, which indicates that  $\beta$ -cell NKA activation is in-part due to phosphorylation of the NKA  $\alpha 1$  subunit by tyrosine kinases. Therefore, it will be important to further examine the mechanisms underlying tyrosine kinase regulation of  $\beta$ -cell NKA function and its role in tuning islet  $[Ca^{2+}]_i$  oscillations as well as GSIS.

SST secretion becomes defective during the pathogenesis of diabetes (33, 71); therefore, control of  $\beta$ -cell NKA function by SSTR signaling would also be expected to be perturbed during T2D. Other islet cell types, including  $\alpha$ - and  $\delta$ -cells, also express high levels of NKA  $\alpha 1$  subunit transcript (11-13), which is supported by our immunofluorescence staining of human pancreatic



sections that showed NKA  $\alpha 1$  subunit expression in insulin-negative islet cells. Furthermore, numerous NKA  $\beta$  and  $\gamma$  subunit transcripts as well as several  $G_{i/o}$ -coupled GPCRs are expressed in  $\alpha$ -cells (i.e. SST, D2-like DRDs, and  $\alpha 1$ -ADRs) and  $\delta$ -cells (i.e. D2-like DRDs and  $\alpha 2$ -ADRs) (11-13, 16, 30, 72). Moreover, NKAs have been shown to regulate  $\alpha$ -cell  $V_m$  in response to fatty acid metabolism (73). Thus, NKA control of plasma membrane  $V_m$  would be expected to influence  $[Ca^{2+}]_i$  dynamics in these other islet cell types and may in-part explain why GIRK channel inhibition fails to completely inhibit SST-induced  $\alpha$ -cell  $V_m$  hyperpolarization (49). Lastly, expression of specific NKA subunits, such as FXYD2, are altered in T2D human islets (11, 74) and in leptin receptor deficient diabetic mouse islets (75). Thus, understanding the role(s) that NKA serves in all islet cell types under physiological and diabetic conditions will illuminate critical features of islet function and dysfunction.

In summary, we identified a conserved  $G_{i/o}$ -coupled mechanism for controlling  $\beta$ -cell  $Ca^{2+}$  entry, and thus insulin secretion in response to numerous  $G_{i/o}$ -coupled GPCR ligands that have been shown to limit insulin secretion (i.e. adrenaline, SST, and dopamine). Moreover, we demonstrated that endogenous SSTR signaling tunes islet  $[Ca^{2+}]_i$  oscillations and presumably pulsatile insulin secretion by activating  $\beta$ -cell NKAs. Finally, we determined that  $G_{i/o}$  signaling stimulates  $\beta$ -cell NKA function by activating tyrosine kinases (e.g. Src and insulin receptors). Taken together, these findings reveal an essential and conserved NKA-mediated mechanism governing  $G_{i/o}$ -coupled signals known to regulate insulin secretion that remained elusive for over half a century (Fig. 7).

## **METHODS**

### **Animals**

All mice were 12- to 18-week old, age-matched males on a C57Bl6/J background (Stock #: 000664; The Jackson Laboratory (JAX), Bar Harbor, ME). Transgenic mice expressing  $G_{i/o}$ -coupled protein-coupled Designer Receptors Exclusively Activated by Designer Drugs

(DREADDs) specifically in  $\delta$ -cells ( $\delta G_i$  DREADDs) were generated by crossing mice expressing a mutant  $G_{i/o}$ -coupled GPCR P2A mCitrine fluorescent reporter (B6.129-Gt(ROSA)<sup>26Sortm1</sup>(CAG-CHRM4\*, -mCitrine)<sup>Ute/J</sup>; Stock #: 026219; JAX) construct preceded by a loxP-flanked STOP cassette with mice expressing a SST-IRES-Cre (Stock #: 013044; JAX) (76, 77). All  $\delta G_i$  DREADD islets were prepared from mice heterozygous for SST-IRES-Cre as endogenous SST is decreased in an allele dosage-dependent manner. Transgenic mice with pancreatic-specific knockout (KO) of *Kcnj6* (gene encoding GIRK2) were generated by crossing animals with a loxP-flanked *Kcnj6* exon 4 with mice expressing a *Pdx1*-Cre (GIRK2 KO<sup>Panc</sup>; Stock #: 014647; JAX) (78, 79). All animals were housed in a Vanderbilt University IACUC (protocol # M1600063-01) approved facility on a 12-hour light/dark cycle with access to standard chow (Lab Diets, 5L0D) *ad libitum*. Mice were humanely euthanized by cervical dislocation followed by exsanguination. To preserve islet ion channel function mice were not treated with anesthesia.

### Human donors

All studies detailed here were approved by the Vanderbilt University Health Sciences Committee Institutional Review Board (IRB# 110164). Healthy human islets were provided from multiple isolation centers by the Integrated Islet Distribution Program (IIDP). Deidentified human donor information is provided in Supplemental Table 1. The IIDP obtained informed consent for deceased donors in accordance with NIH guidelines prior to reception of human islets for our studies.

### Chemicals and reagents

Unless otherwise noted all chemicals and reagents were purchased from Sigma-Aldrich (St. Louis, MO) or Thermo Fisher (Waltham, MA). Clozapine N-oxide (CNO) was purchased from Hello Bio (Princeton, NJ). Clonidine hydrochloride (Clon), forskolin (FSK), and ouabain (Oua) were purchased from R&D Systems (Minneapolis, MN). Tertiapin-Q (TPQ) was purchased from

Alomone Labs (Jerusalem, Israel). Dasatinib (Dasa), H-89, and NSC 87877 were purchased from Cayman Chemical (Ann Arbor, MI). An optimized rat insulin promoter (RIP) (50) and the coding sequence of hM4D(Gi)-mCherry (G<sub>i/o</sub>-coupled DREADD-mCherry fusion protein; Plasmid #75033; Addgene, Watertown, MA) (80) were cloned into a pLenti6 lentiviral transfer plasmid and utilized to produce 3rd-generation lentiviruses (LVs) as previously described (81).

### **Islet isolation**

Mouse pancreata were digested with collagenase P (Roche; Basel, Switzerland) and islets were isolated using density gradient centrifugation (82); mouse islets were cultured in RPMI-1640 (Corning) media with 5.6 mM glucose supplemented with 15% FBS, 100 IU·ml<sup>-1</sup> penicillin, and 100mg·ml<sup>-1</sup> streptomycin (RPMI) at 37°C, 5% CO<sub>2</sub>. Upon arrival, human islets were allowed to recover for at least 2 hours in CMRL-1066 (Corning, Cleveland, TN) media containing 5.6mM glucose and supplemented with 20% fetal bovine serum (FBS), 100IU·ml<sup>-1</sup> penicillin, 100mg·ml<sup>-1</sup> streptomycin, 2mM GlutaMAX, 2mM HEPES, and 1mM sodium pyruvate (CMRL) at 37°C, 5% CO<sub>2</sub>. Mouse and human islets were cultured in poly-d-lysine-coated 35mm glass-bottomed dishes (CellVis, Mountain View, CA) and all experiments were conducted within 48 hours.

### **Patch-clamp electrophysiology**

Patch electrodes (3-4MΩ) were backfilled with intracellular solution containing (mM) 90.0 KCl, 50.0 NaCl, 1.0 MgCl<sub>2</sub>, 10.0 EGTA, 10.0 HEPES, and 0.005 amphotericin B (adjusted to pH 7.2 with KOH). Mouse and human islets were patched in Krebs-Ringer HEPES buffer (2mL; KRHB) containing (mM) 119.0 NaCl, 4.7 KCl, 2.0 CaCl<sub>2</sub>, 1.2 MgSO<sub>4</sub>, 1.2 KH<sub>2</sub>PO<sub>4</sub>, and 10.0 HEPES (pH 7.35 adjusted by NaOH) supplemented with 2mM glucose; a perforated whole-cell patch-clamp technique was utilized to record β-cell membrane potential ( $V_m$ ) in current-clamp mode using an Axopatch 200B amplifier with pCLAMP10 software (Molecular Devices). Islet cells that did not display electrical activity at 2mM glucose were identified as β-cells. After a perforated patch

configuration was established (seal resistance >1.0GΩ; leak <20.0pA)  $V_m$  depolarization and action potential (AP) firing were induced by exchanging the bath solution with KRHB supplemented with 20mM glucose and 1mM tolbutamide. After AP firing was observed, the amplifier was switched to voltage-clamp mode;  $V_m$  was held at -60mV and ramped from -100mV to -50mV every 15 seconds for at least 2 minutes and the resulting  $\beta$ -cell currents were recorded. The amplifier was then returned to current-clamp mode and  $V_m$  was recorded. Mouse and human islets were perfused with further treatments and changes in  $\beta$ -cell  $V_m$  and currents were measured as indicated in figure legends.

### **Intracellular $Ca^{2+}$ and cAMP imaging**

For simultaneous islet  $[Ca^{2+}]_i$  and  $[cAMP]_i$  imaging, mouse islets were transduced for 4 hours with an adenovirus (AV) expressing a CMV-jRGECO1a-P2A-cAMP<sub>r</sub> construct (VectorBuilder, Chicago, IL) and cultured 24 hours at 37°C, 5% CO<sub>2</sub> prior to imaging. Alternatively, mouse islets were loaded with a Fura-2 AM  $Ca^{2+}$  indicator (2μM) for 30 minutes before the start of an experiment. Human islets were either transduced for 4 hours with an AV expressing RIP-GCaMP6s (VectorBuilder) and cultured 48 hours before imaging or loaded with a Cal-590  $Ca^{2+}$  indicator (10μM; AAT Bioquest, Sunnyvale, CA) for 1 hour prior to the start of a study. Before each experiment, islet culture media was replaced with 2mL KRHB supplemented with 2mM glucose; after 10 minutes, the islets were treated as detailed in figure legends. Mouse islet jRGECO1a (excitation (Ex): 561nm; emission (Em): 620±50nm) and cAMP<sub>r</sub> fluorescence (Ex: 488nm; Em: 525±32nm) were simultaneously measured every 5 seconds utilizing an LSM 780 multi-photon confocal microscope equipped with Zeiss Zen software (20x magnification; LSM 780) as indicators of  $[Ca^{2+}]_i$  and  $[cAMP]_i$  respectively. Mouse islet Fura-2 AM fluorescence (Ex: 340nm and 380nm; Em: 510±40nm) was measured every 5 seconds with a Nikon Ti2 epifluorescence microscope equipped with a Prime 95B camera with 25mm CMOS sensors and Nikon Elements software (10x magnification; Nikon Ti2); the ratio of Fura-2 AM fluorescence

excited at 340nm and 380nm was utilized as an indicator of  $[Ca^{2+}]_i$ . Human islet Cal-590 (Ex: 560±20nm; Em: 630±37.5nm) or  $\beta$ -cell GCaMP6s fluorescence (Ex: 488nm; Em: 531±48nm) was measured every 5 seconds as an indicator of  $[Ca^{2+}]_i$  utilizing the LSM 780 microscope (20x magnification).

### **Intracellular $Ca^{2+}$ and $Na^+$ imaging**

For simultaneous islet  $[Ca^{2+}]_i$  and  $[Na]_i$  imaging, mouse islets were loaded with a Fura Red AM  $Ca^{2+}$  indicator (5 $\mu$ M; catalog #: F3021; Thermo Fisher) and an ION Natrium Green-2 (ING-2)  $Na^+$  indicator (5 $\mu$ M; catalog #: 2011F; Ion Biosciences, San Marcos, TX) for 1 hour before the start of an experiment. Before each experiment, islet culture media was replaced with KRHB supplemented with 2mM glucose; after 10 minutes, the islets were treated as detailed in figure legends. Mouse islet Fura Red (Ex: 430±12nm and 500±10nm; Em: 700±37.5nm) fluorescence was measured every 5 seconds with the Nikon Ti2 (10x magnification); the ratio of Fura Red fluorescence excited at 500±10nm and 430±12nm was utilized as an indicator of  $[Ca^{2+}]_i$ . Mouse islet ING-2 fluorescence (Ex: 500±10nm; Em: 535±15nm) was measured simultaneously every 5 seconds as an indicator of  $[Na]_i$ .

### **Immunofluorescence imaging**

Paraffin-embedded human pancreas sections were processed and probed as previously described (81). Following rehydration, sections were subject to Tris-EDTA-SDS antigen retrieval at 37°C for 40 minutes (83); pancreas sections were stained with primary antibodies (1:100 mouse anti-ATP1A1 (catalog #: MA3-928; Thermo Fisher) and 1:1000 guinea pig anti-insulin (catalog #: 20-IP35; Fitzgerald, North Acton, MA) followed by secondary antibodies (1:300 donkey anti-mouse Alexa Fluor 647 (catalog #: 715-606-150; Jackson ImmunoResearch, West Grove, PA) and 1:300 donkey anti-guinea pig Alexa Fluor 488 (catalog #: 706-546-148; Jackson

ImmunoResearch)). Immunofluorescence images were collected with a Zeiss LSM 710 META inverted confocal microscope (40x magnification).

### **Hormone secretion assays**

Mouse islets were cultured overnight in RPMI (supplemented with 0.5mg/mL BSA) then transferred to equilibration media (DMEM (no glucose) with 10% FBS, 0.5mg/mL BSA, 10mM HEPES, and 0.5mM CaCl<sub>2</sub>) supplemented with 5.6mM glucose for 1 hour at 37°C, 5% CO<sub>2</sub>. Islets were picked on ice into a 24-well plate (Corning) containing 400µL of secretion media (DMEM (no glucose) with 0.5mg/mL BSA, 10mM HEPES, and 0.5mM CaCl<sub>2</sub>) supplemented with the glucose concentrations and treatments indicated in figure legends then cultured for 1 hour at 37°C, 5% CO<sub>2</sub>. Secretion was halted by transferring the plate to ice for 10 minutes and supernatants were collected in low retention 1.6mL centrifuge tubes. Supernatants were supplemented with 1:100 mammalian protease inhibitor cocktail and stored at -20°C until analyzed. Secreted insulin was measured as per manufacturer instructions with ALPCO insulin chemiluminescence ELISA kits (15 islets per sample; catalog #: 80-INSHU-CH01) or Mercodia mouse insulin ELISA kits (50 islets per sample; catalog #: 10-1247-01); secreted SST was measured as per manufacturer instructions with Phoenix Pharmaceuticals SST chemiluminescent EIA kits (50 islets per sample; CEK-060-03).

### **NKA immunoblotting**

Mouse islets were isolated and incubated overnight in RPMI supplemented with 5.6mM glucose at 37°C and 5% CO<sub>2</sub>. The islets were transferred to KRHB supplemented with treatments indicated in figure legends for 15 minutes at room temperature, washed with phosphate-buffered saline supplemented with identical treatments along with 20µL/mL Halt protease/phosphatase inhibitor cocktail (Halt PPI; catalog #: 78442), and frozen in a dry ice ethanol bath. Islets were lysed on ice in RIPA buffer supplemented with Halt PPI, then cell lysates were resolved on

nitrocellulose membranes. Immunoblots were blocked for 1 hour in Tris-buffered saline with 0.1% Tween 20 (TBST) supplemented with 5% BSA. All primary and secondary antibodies were diluted in TBST supplemented with 0.1% BSA. Immunoblots were probed with 1:500 rabbit anti-phospho-ATP1A1 (Y10) (p-ATP1A1<sup>Y10</sup>; catalog #: PA5-17061; Thermo Fisher) followed by 1:2500 goat anti-rabbit HRP-conjugated secondary (catalog #: W4011; Promega, Madison, WI). p-ATP1A1<sup>Y10</sup> protein bands were visualized with SuperSignal™ West Pico Plus (SuperSignal Pico; catalog #: 34580; Thermo Fisher) utilizing a Bio-Rad Digital ChemiDoc MP (ChemiDoc). Immunoblots were stripped for 20 minutes with Restore™ Western Blot Stripping Buffer (catalog #: 21059; Thermo Fisher) and re-probed with the following: 1:500 rabbit anti-phospho-ATP1A1 (Y260) (p-ATP1A1<sup>Y260</sup>; catalog #: PA5-118769; Thermo Fisher) followed by 1:2500 goat anti-rabbit HRP-conjugated secondary; 1:1000 mouse anti-ATP1A1 followed by 1:2500 goat anti-mouse HRP-conjugated secondary (catalog #: W4021; Promega). p-ATP1A1<sup>Y260</sup> and ATP1A1 bands were visualized with SuperSignal Pico utilizing the ChemiDoc.

## Data analysis

Islet  $[Ca^{2+}]_i$ ,  $[cAMP]_i$ ,  $[Na^+]_i$ , and NKA immunofluorescence were analyzed using Zeiss Zen software, Nikon Elements software, and the ImageJ Fiji image processing pack. Axon Clampfit software was utilized to quantify  $\beta$ -cell SST-induced currents and  $V_m$  as well as perform cross-correlation analyses. All  $\beta$ -cell SST-induced currents are median values of 10 or more consecutive traces. Heatmaps were generated using the MATLAB `imagesc` function. Period analysis of  $\delta G_i$  islet  $[Ca^{2+}]_i$  oscillations was carried out utilizing the MATLAB `detrend` and `findpeaks` functions. Immunoblots were analyzed using Bio-Rad Image Lab 5.0. Figures were prepared utilizing Adobe Illustrator. Statistical analyses were carried out utilizing Microsoft Excel and GraphPad Prism 9.2.0 as indicated in figure legends; data were compared utilizing paired or unpaired two-sample t-tests, one-sample t-tests, or one-way analysis of variance (ANOVA) with Šidák's post-hoc multiple comparisons tests. Data were normalized when appropriate as indicated in figure

legends. Unless stated otherwise, data are presented as mean values  $\pm$  standard error (SEM) for the specified number of samples ( $n$ ). Differences were considered significant for  $P \leq 0.05$ .

### **Study Approval**

Animal: All animals employed in these studies were handled in compliance with guidelines approved by the Vanderbilt University Institutional Animal Care and Use Committee (IACUC).

Human: All studies detailed here were approved by the Vanderbilt University Health Sciences Committee Institutional Review Board (IRB# 110164). The IIDP obtained informed consent for deceased donors in accordance with NIH guidelines prior to reception of human islets for these studies.



## AUTHOR CONTRIBUTIONS

MTD and DAJ formulated and designed experiments. MTD, PKD, KEZ, AYN, CMS, JRD, NMW, JCL, and CS performed experiments. MTD and DAJ analyzed data. MTD and DAJ interpreted experimental results. MTD and DAJ prepared figures. MTD and DAJ drafted the manuscript. MTD, PKD, KEZ, AYN, CMS, JRD, NMW, JCL, CS, and DAJ approved the final manuscript submitted for publication.

## ACKNOWLEDGEMENTS

We thank Dr. Kevin D. Wickman (University of Minnesota) for providing mice with a loxP-flanked *Kcnj6* exon 4. We are also grateful for the confocal microscopy resources provided by the Vanderbilt Cell Imaging Shared Resource (CISR; supported by NIH grants CA68485, DK20593, DK58404, DK59637 and EY08126). This research was performed with the support of the Integrated Islet Distribution Program (<https://iidp.coh.org/>). We especially thank the organ donors and their families. **Funding:** These studies has been supported by a Vanderbilt Integrated Training in Engineering and Diabetes Grant (T32DK101003), an Initiative for Maximizing Student Development at Vanderbilt Grant (T32GM139800), a Multidisciplinary Training in Molecular Endocrinology Grant (T32DK007563), National Institutes of Health Grants (DK-097392 and DK-115620), an American Diabetes Association Grant (1-17-IBS-024), a Juvenile Diabetes Research Foundation Grant (2-SRA-2019-701-S-B), and a Pilot and Feasibility grant through the Vanderbilt Diabetes Research and Training Center Grant (P60-DK-20593).

## REFERENCES

1. Rhodes C, and White M. Molecular insights into insulin action and secretion. *European journal of clinical investigation*. 2002;32:3-13.
2. Röder PV, Wu B, Liu Y, and Han W. Pancreatic regulation of glucose homeostasis. *Experimental & molecular medicine*. 2016;48(3):e219-e.
3. Curry DL, Bennett LL, and Grodsky GM. Requirement for calcium ion in insulin secretion by the perfused rat pancreas. *American Journal of Physiology-Legacy Content*. 1968;214(1):174-8.
4. Rorsman P, Braun M, and Zhang Q. Regulation of calcium in pancreatic  $\alpha$ - and  $\beta$ -cells in health and disease. *Cell calcium*. 2012;51(3-4):300-8.
5. Lewandowski SL, Cardone RL, Foster HR, Ho T, Potapenko E, Poudel C, et al. Pyruvate kinase controls signal strength in the insulin secretory pathway. *Cell metabolism*. 2020;32(5):736-50. e5.
6. Gilon P, Shepherd RM, and Henquin J-C. Oscillations of secretion driven by oscillations of cytoplasmic  $Ca^{2+}$  as evidences in single pancreatic islets. *Journal of Biological Chemistry*. 1993;268(30):22265-8.
7. Gilon P, Chae H-Y, Rutter GA, and Ravier MA. Calcium signaling in pancreatic  $\beta$ -cells in health and in Type 2 diabetes. *Cell calcium*. 2014;56(5):340-61.
8. Pace CS, Murphy M, Conant S, and Lacy PE. Somatostatin inhibition of glucose-induced electrical activity in cultured rat islet cells. *American Journal of Physiology-Cell Physiology*. 1977;233(5):C164-C71.
9. Santana De Sa S, Ferrer R, Rojas E, and Atwater I. Effects of adrenaline and noradrenaline on glucose-induced electrical activity of mouse pancreatic  $\beta$  cell. *Quarterly Journal of Experimental Physiology: Translation and Integration*. 1983;68(2):247-58.
10. Pace CS, and Tarvin JT. Somatostatin: Mechanism of action in pancreatic islet  $\beta$ -cells. *Diabetes*. 1981;30(10):836-42.
11. Segerstolpe Å, Palasantza A, Eliasson P, Andersson E-M, Andréasson A-C, Sun X, et al. Single-cell transcriptome profiling of human pancreatic islets in health and type 2 diabetes. *Cell metabolism*. 2016;24(4):593-607.
12. DiGruccio MR, Mawla AM, Donaldson CJ, Noguchi GM, Vaughan J, Cowing-Zitron C, et al. Comprehensive alpha, beta and delta cell transcriptomes reveal that ghrelin selectively activates delta cells and promotes somatostatin release from pancreatic islets. *Molecular metabolism*. 2016;5(7):449-58.
13. Blodgett DM, Nowosielska A, Afik S, Pechhold S, Cura AJ, Kennedy NJ, et al. Novel observations from next-generation RNA sequencing of highly purified human adult and fetal islet cell subsets. *Diabetes*. 2015;64(9):3172-81.
14. Berger M, Scheel DW, Macias H, Miyatsuka T, Kim H, Hoang P, et al. Gai/o-coupled receptor signaling restricts pancreatic  $\beta$ -cell expansion. *Proceedings of the National Academy of Sciences*. 2015;112(9):2888-93.
15. Amisten S, Salehi A, Rorsman P, Jones PM, and Persaud SJ. An atlas and functional analysis of G-protein coupled receptors in human islets of Langerhans. *Pharmacology & therapeutics*. 2013;139(3):359-91.
16. Kailey B, van de Bunt M, Cheley S, Johnson PR, MacDonald PE, Gloyn AL, et al. SSTR2 is the functionally dominant somatostatin receptor in human pancreatic  $\beta$ - and  $\alpha$ -cells. *American journal of physiology-endocrinology and metabolism*. 2012;303(9):E1107-E16.
17. Malaisse W, Malaisse-Lagae F, Wright PH, and Ashmore J. Effects of adrenergic and cholinergic agents upon insulin secretion in vitro. *Endocrinology*. 1967;80(5):975-8.

18. Ustione A, and Piston DW. Dopamine synthesis and D3 receptor activation in pancreatic  $\beta$ -cells regulates insulin secretion and intracellular  $[Ca^{2+}]$  oscillations. *Molecular endocrinology*. 2012;26(11):1928-40.
19. Sieg A, Su J, Muñoz A, Buchenau M, Nakazaki M, Aguilar-Bryan L, et al. Epinephrine-induced hyperpolarization of islet cells without KATP channels. *American Journal of Physiology-Endocrinology and Metabolism*. 2004;286(3):E463-E71.
20. Zhang Y, Shumilina E, Häring H-U, Lang F, and Ullrich S. Epinephrine-induced hyperpolarization of pancreatic islet cells is sensitive to PI3K–PDK1 signaling. *FEBS letters*. 2009;583(18):3101-6.
21. Hellman B, Dansk H, and Grapengiesser E. Somatostatin promotes glucose generation of  $Ca^{2+}$  oscillations in pancreatic islets both in the absence and presence of tolbutamide. *Cell calcium*. 2018;74:35-42.
22. Fagerholm V, Haaparanta M, and Scheinin M.  $\alpha$ 2-Adrenoceptor regulation of blood glucose homeostasis. *Basic & clinical pharmacology & toxicology*. 2011;108(6):365-70.
23. Fagerholm V, Scheinin M, and Haaparanta M.  $\alpha$ 2A-Adrenoceptor antagonism increases insulin secretion and synergistically augments the insulinotropic effect of glibenclamide in mice. *British journal of pharmacology*. 2008;154(6):1287-96.
24. Klein C, Morton N, Kelley S, and Metz S. Transdermal clonidine therapy in elderly mild hypertensives: effects on blood pressure, plasma norepinephrine and fasting plasma glucose. *Journal of hypertension Supplement: official journal of the International Society of Hypertension*. 1985;3(4):S81-4.
25. Lattermann R, Schricker T, Georgieff M, and Schreiber M. Low dose clonidine premedication accentuates the hyperglycemic response to surgery. *Canadian Journal of Anesthesia*. 2001;48(8):755-9.
26. E Drigo RA, Jacob S, García-Prieto CF, Zheng X, Fukuda M, Nhu HTT, et al. Structural basis for delta cell paracrine regulation in pancreatic islets. *Nature communications*. 2019;10(1):1-12.
27. Farino ZJ, Morgenstern TJ, Maffei A, Quick M, De Solis AJ, Wiryasermkul P, et al. New roles for dopamine D2 and D3 receptors in pancreatic beta cell insulin secretion. *Molecular psychiatry*. 2020;25(9):2070-85.
28. Croze ML, Flisher MF, Guillaume A, Tremblay C, Noguchi GM, Granziera S, et al. Free fatty acid receptor 4 inhibitory signaling in delta cells regulates islet hormone secretion in mice. *Molecular metabolism*. 2021;45:101166.
29. Huising MO, van der Meulen T, Huang JL, Pourhosseinzadeh MS, and Noguchi GM. The difference  $\delta$ -cells make in glucose control. *Physiology*. 2018;33(6):403-11.
30. Aslanoglou D, Bertera S, Sánchez-Soto M, Free RB, Lee J, Zong W, et al. Dopamine regulates pancreatic glucagon and insulin secretion via adrenergic and dopaminergic receptors. *Translational psychiatry*. 2021;11(1):1-18.
31. Katada T, and Ui M. Islet-activating protein. Enhanced insulin secretion and cyclic AMP accumulation in pancreatic islets due to activation of native calcium ionophores. *Journal of Biological Chemistry*. 1979;254(2):469-79.
32. Rosengren AH, Jokubka R, Tojjar D, Granhall C, Hansson O, Li D-Q, et al. Overexpression of alpha2A-adrenergic receptors contributes to type 2 diabetes. *Science*. 2010;327(5962):217-20.
33. Vergari E, Denwood G, Salehi A, Zhang Q, Adam J, Alrifaiy A, et al. Somatostatin secretion by  $Na^{+}$ -dependent  $Ca^{2+}$ -induced  $Ca^{2+}$  release in pancreatic delta cells. *Nature metabolism*. 2020;2(1):32-40.
34. Dupuis J, Langenberg C, Prokopenko I, Saxena R, Soranzo N, Jackson AU, et al. New genetic loci implicated in fasting glucose homeostasis and their impact on type 2 diabetes risk. *Nature genetics*. 2010;42(2):105-16.

35. Düfer M, Haspel D, Krippeit-Drews P, Aguilar-Bryan L, Bryan J, and Drews G. Activation of the Na<sup>+</sup>/K<sup>+</sup>-ATPase by insulin and glucose as a putative negative feedback mechanism in pancreatic beta-cells. *Pflügers Archiv-European Journal of Physiology*. 2009;457(6):1351-60.
36. Iwanir S, and Reuveny E. Adrenaline-induced hyperpolarization of mouse pancreatic islet cells is mediated by G protein-gated inwardly rectifying potassium (GIRK) channels. *Pflügers Archiv-European Journal of Physiology*. 2008;456(6):1097-108.
37. Lüscher C, and Slesinger PA. Emerging roles for G protein-gated inwardly rectifying potassium (GIRK) channels in health and disease. *Nature Reviews Neuroscience*. 2010;11(5):301-15.
38. Ewart HS, and Klip A. Hormonal regulation of the Na(+)-K(+)-ATPase: mechanisms underlying rapid and sustained changes in pump activity. *American Journal of Physiology-Cell Physiology*. 1995;269(2):C295-C311.
39. Therien AG, and Blostein R. Mechanisms of sodium pump regulation. *American Journal of Physiology-Cell Physiology*. 2000;279(3):C541-C66.
40. Henquin J-C, and Meissner H. The electrogenic sodium—potassium pump of mouse pancreatic B-cells. *The Journal of physiology*. 1982;me332(1):529-52.
41. Kajikawa M, Fujimoto S, Tsuura Y, Mukai E, Takeda T, Hamamoto Y, et al. Ouabain suppresses glucose-induced mitochondrial ATP production and insulin release by generating reactive oxygen species in pancreatic islets. *Diabetes*. 2002;51(8):2522-9.
42. Owada S, Larsson O, Arkhammar P, Katz AI, Chibalin AV, Berggren P-O, et al. Glucose decreases Na<sup>+</sup>, K<sup>+</sup>-ATPase activity in pancreatic β-cells: An effect mediated via Ca<sup>2+</sup>-independent phospholipase A<sub>2</sub> and protein kinase C dependent phosphorylation of the α-subunit. *Journal of Biological Chemistry*. 1999;274(4):2000-8.
43. Gadelha MR, Kasuki L, and Korbonits M. Novel pathway for somatostatin analogs in patients with acromegaly. *Trends in Endocrinology & Metabolism*. 2013;24(5):238-46.
44. Wang XQ, and Yu SP. Novel regulation of Na<sup>+</sup>, K<sup>+</sup>-ATPase by Src tyrosine kinases in cortical neurons. *Journal of neurochemistry*. 2005;93(6):1515-23.
45. Tamiya S, Okafor MC, and Delamere NA. Purinergic agonists stimulate lens Na-K-ATPase-mediated transport via a Src tyrosine kinase-dependent pathway. *American Journal of Physiology-Cell Physiology*. 2007;293(2):C790-C6.
46. Poulsen H, Morth P, Egebjerg J, and Nissen P. Phosphorylation of the Na<sup>+</sup>, K<sup>+</sup>-ATPase and the H<sup>+</sup>, K<sup>+</sup>-ATPase. *FEBS letters*. 2010;584(12):2589-95.
47. Tian J, Cai T, Yuan Z, Wang H, Liu L, Haas M, et al. Binding of Src to Na<sup>+</sup>/K<sup>+</sup>-ATPase forms a functional signaling complex. *Molecular biology of the cell*. 2006;17(1):317-26.
48. Gromada J, Franklin I, and Wollheim CB. α-Cells of the endocrine pancreas: 35 years of research but the enigma remains. *Endocrine reviews*. 2007;28(1):84-116.
49. Singh B, Khattab F, Chae H, Desmet L, Herrera PL, and Gilon P. KATP channel blockers control glucagon secretion by distinct mechanisms: a direct stimulation of α-cells involving a [Ca<sup>2+</sup>]<sub>i</sub> rise and an indirect inhibition mediated by somatostatin. *Molecular Metabolism*. 2021:101268.
50. Wang H, Bender A, Wang P, Karakose E, Inabnet WB, Libutti SK, et al. Insights into beta cell regeneration for diabetes via integration of molecular landscapes in human insulinomas. *Nature communications*. 2017;8(1):1-15.
51. Tengholm A. Cyclic AMP dynamics in the pancreatic β-cell. *Uppsala journal of medical sciences*. 2012;117(4):355-69.
52. Capozzi ME, Svendsen B, Encisco SE, Lewandowski SL, Martin MD, Lin H, et al. β Cell tone is defined by proglucagon peptides through cAMP signaling. *JCI insight*. 2019;4(5).
53. Rosenzweig T, Aga-Mizrachi S, Bak A, and Sampson SR. Src tyrosine kinase regulates insulin-induced activation of protein kinase C (PKC) δ in skeletal muscle. *Cellular signalling*. 2004;16(11):1299-308.

54. Banerjee M, Cui X, Li Z, Yu H, Cai L, Jia X, et al. Na/K-ATPase Y260 Phosphorylation–mediated Src Regulation in Control of Aerobic Glycolysis and Tumor Growth. *Scientific reports*. 2018;8(1):1-13.
55. Feraille E, Carranza ML, Rousselot M, and Favre H. Modulation of Na<sup>+</sup>,K<sup>(+)</sup>-ATPase activity by a tyrosine phosphorylation process in rat proximal convoluted tubule. *J Physiol*. 1997;498 ( Pt 1):99-108.
56. Songyang Z, Carraway KL, Eck MJ, Harrison SC, Feldman RA, Mohammadi M, et al. Catalytic specificity of protein-tyrosine kinases is critical for selective signalling. *Nature*. 1995;373(6514):536-9.
57. Tengholm A, and Gylfe E. cAMP signalling in insulin and glucagon secretion. *Diabetes, obesity and metabolism*. 2017;19:42-53.
58. Maczewsky J, Kaiser J, Gresch A, Gerst F, Düfer M, Krippeit-Drews P, et al. TGR5 activation promotes stimulus-secretion coupling of pancreatic  $\beta$ -cells via a PKA-dependent pathway. *Diabetes*. 2019;68(2):324-36.
59. Gerst F, Singer C, Noack K, Graf D, Kaiser G, Panse M, et al. Glucose Responsiveness of  $\beta$ -Cells Depends on Fatty Acids. *Experimental and Clinical Endocrinology & Diabetes*. 2020;128(10):644-53.
60. El K, Gray S, Capozzi M, Knuth E, Jin E, Svendsen B, et al. GIP mediates the incretin effect and glucose tolerance by dual actions on  $\alpha$  cells and  $\beta$  cells. *Science advances*. 2021;7(11):eabf1948.
61. Hucho TB, Dina OA, and Levine JD. Epac mediates a cAMP-to-PKC signaling in inflammatory pain: an isolectin B4 (+) neuron-specific mechanism. *Journal of Neuroscience*. 2005;25(26):6119-26.
62. Lezoualc’h F, Fazal L, Laudette M, and Conte C. Cyclic AMP sensor EPAC proteins and their role in cardiovascular function and disease. *Circulation research*. 2016;118(5):881-97.
63. Holz GG. Epac: a new cAMP-binding protein in support of glucagon-like peptide-1 receptor-mediated signal transduction in the pancreatic  $\beta$ -cell. *Diabetes*. 2004;53(1):5-13.
64. VanSchouwen B, Selvaratnam R, Giri R, Lorenz R, Herberg FW, Kim C, et al. Mechanism of cAMP Partial Agonism in Protein Kinase G (PKG). *Journal of Biological Chemistry*. 2015;290(48):28631-41.
65. Ramos-Alvarez I, Lee L, and Jensen RT. Cyclic AMP-dependent protein kinase A and EPAC mediate VIP and secretin stimulation of PAK4 and activation of Na<sup>+</sup>, K<sup>+</sup>-ATPase in pancreatic acinar cells. *American Journal of Physiology-Gastrointestinal and Liver Physiology*. 2019;316(2):G263-G77.
66. Walter AO, Peng Z-Y, and Cartwright CA. The Shp-2 tyrosine phosphatase activates the Src tyrosine kinase by a non-enzymatic mechanism. *Oncogene*. 1999;18(11):1911-20.
67. Lundholm MD, and Charnogursky GA. Dasatinib-induced hypoglycemia in a patient with acute lymphoblastic leukemia. *Clinical Case Reports*. 2020;8(7):1238.
68. Agostino NM, Chinchilli VM, Lynch CJ, Koszyk-Szewczyk A, Gingrich R, Sivik J, et al. Effect of the tyrosine kinase inhibitors (sunitinib, sorafenib, dasatinib, and imatinib) on blood glucose levels in diabetic and nondiabetic patients in general clinical practice. *Journal of Oncology Pharmacy Practice*. 2011;17(3):197-202.
69. Huda MS, Amiel SA, Ross P, and Aylwin SJ. Tyrosine kinase inhibitor sunitinib allows insulin independence in long-standing type 1 diabetes. *Diabetes Care*. 2014;37(5):e87-e8.
70. De Meyts P. The insulin receptor and its signal transduction network. *Endotext [Internet]*. 2016.
71. Gerich JE. Somatostatin and diabetes. *The American journal of medicine*. 1981;70(3):619-26.
72. Rorsman P, and Huisig MO. The somatostatin-secreting pancreatic  $\delta$ -cell in health and disease. *Nature Reviews Endocrinology*. 2018;14(7):404-14.
73. Briant LJ, Dodd MS, Chibalina MV, Rorsman NJ, Johnson PR, Carmeliet P, et al. CPT1a-dependent long-chain fatty acid oxidation contributes to maintaining glucagon secretion from pancreatic islets. *Cell reports*. 2018;23(11):3300-11.

74. Xin Y, Kim J, Okamoto H, Ni M, Wei Y, Adler C, et al. RNA sequencing of single human islet cells reveals type 2 diabetes genes. *Cell metabolism*. 2016;24(4):608-15.
75. John AN, Ram R, and Jiang F-X. RNA-seq analysis of islets to characterise the dedifferentiation in type 2 diabetes model mice db/db. *Endocrine pathology*. 2018;29(3):207-21.
76. Taniguchi H, He M, Wu P, Kim S, Paik R, Sugino K, et al. A resource of Cre driver lines for genetic targeting of GABAergic neurons in cerebral cortex. *Neuron*. 2011;71(6):995-1013.
77. Zhu H, Aryal DK, Olsen RH, Urban DJ, Swearingen A, Forbes S, et al. Cre-dependent DREADD (designer receptors exclusively activated by designer drugs) mice. *Genesis*. 2016;54(8):439-46.
78. Kotecki L, Hearing M, McCall NM, de Velasco EMF, Pravetoni M, Arora D, et al. GIRK channels modulate opioid-induced motor activity in a cell type-and subunit-dependent manner. *Journal of Neuroscience*. 2015;35(18):7131-42.
79. Hingorani SR, Petricoin III EF, Maitra A, Rajapakse V, King C, Jacobetz MA, et al. Preinvasive and invasive ductal pancreatic cancer and its early detection in the mouse. *Cancer cell*. 2003;4(6):437-50.
80. Grace PM, Strand KA, Galer EL, Urban DJ, Wang X, Baratta MV, et al. Morphine paradoxically prolongs neuropathic pain in rats by amplifying spinal NLRP3 inflammasome activation. *Proceedings of the National Academy of Sciences*. 2016;113(24):E3441-E50.
81. Dickerson MT, Dadi PK, Butterworth RB, Nakhe AY, Graff SM, Zaborska KE, et al. Tetraspanin-7 regulation of L-type voltage-dependent calcium channels controls pancreatic  $\beta$ -cell insulin secretion. *The Journal of Physiology*. 2020;598(21):4887-905.
82. Carter JD, Dula SB, Corbin KL, Wu R, and Nunemaker CS. A practical guide to rodent islet isolation and assessment. *Biological procedures online*. 2009;11(1):3-31.
83. Syrbu SI, and Cohen MB. *Signal Transduction Immunohistochemistry*. Springer; 2011:101-10.

## FIGURE LEGENDS

**Fig. 1: SSTR-mediated  $\beta$ -cell currents are not due to GIRK channel activation.** (A) Representative  $\beta$ -cell  $V_m$  recording from an intact mouse islet. Whole-cell  $\beta$ -cell currents were measured in response to a voltage ramp protocol (inset) after treatment with (1) 20mM glucose (20G)+1mM tolbutamide (Tolb) and (2) 20G+1mM Tolb+200nM SST. (B) Average C57  $\beta$ -cell currents with 20G+1mM Tolb before (white) and after SST (green;  $n=11$   $\beta$ -cells in intact islets; \*\*\*\* $P<0.0001$ ). (C) Average SST-induced C57  $\beta$ -cell currents (green;  $n=11$   $\beta$ -cells in intact islets; \*\*\*\* $P<0.0001$ ). (D) Average C57  $\beta$ -cell  $V_m$  with 20G+Tolb before (white) and after SST (green;  $n=13$   $\beta$ -cells in intact islets; \*\*\*\* $P<0.0001$ ). (E) Average GIRK2 KO<sup>Panc</sup>  $\beta$ -cell currents with 20G+Tolb before (dark blue) and after SST (green;  $n=4$   $\beta$ -cells in intact islets; \*\*\*\* $P<0.0001$ ). (F) Average SST-induced GIRK2 KO<sup>Panc</sup>  $\beta$ -cell currents (green;  $n=4$   $\beta$ -cells in intact islets; \*\*\*\* $P<0.0001$ ). (G) Average GIRK2 KO<sup>Panc</sup>  $\beta$ -cell  $V_m$  with 20G+Tolb before (dark blue) and after SST (green;  $n=4$   $\beta$ -cells in intact islets; \*\* $P<0.01$ ). (H) Representative normalized ( $F/F_{min}$ ) C57 islet Fura-2  $Ca^{2+}$  responses to 200nM SST in the presence of 20G+1mM Tolb. (I) Average percentage of C57 (white;  $n$ =islets from 6 mice) and GIRK2 KO<sup>Panc</sup> (dark blue;  $n$ =islets from 3 mice) islets displaying SST-induced  $[Ca^{2+}]_i$  oscillations. (J) Average GIRK2 KO<sup>Panc</sup> islet  $[Ca^{2+}]_i$  plateau fraction (defined as Fura-2 fluorescence after treatment  $\geq 50\%$  of average Fura-2 fluorescence before SST treatment) with 20G+Tolb before (dark blue) and after SST (green;  $n$ =islets from 3 mice; \*\* $P<0.01$ ). (K) Representative  $\beta$ -cell  $V_m$  recording from an intact mouse islet. Whole-cell  $\beta$ -cell currents were measured in response to a voltage ramp protocol after treatment with (1) 20G+1mM Tolb, (2) 20G+1mM Tolb+200nM tertiapin-Q (TPQ), and (3) 20G+1mM Tolb+200nM TPQ+200nM SST. (L) Average C57  $\beta$ -cell currents with 20G+Tolb (white), with TPQ (pink), and with TPQ+SST (blue;  $n=8$   $\beta$ -cells in intact islets; \*\*\*\* $P<0.0001$ ). (M) Average TPQ-induced (pink) and TPQ+SST-induced C57  $\beta$ -cell currents (green;  $n=8$   $\beta$ -cells in intact islets; \*\*\*\* $P<0.0001$ ). (N) Average C57  $\beta$ -cell  $V_m$  with 20G+Tolb (white), after TPQ (pink), and after TPQ+SST (blue;  $n=8$   $\beta$ -cells in intact islets; \*\*\* $P<0.001$ ). (O) Representative normalized ( $F/F_{min}$ ) C57 islet Fura-2  $Ca^{2+}$  responses to 200nM SST and 200nM TPQ in the presence of 20G+1mM Tolb. (P) Average percentage of C57 islets with 20G+Tolb displaying  $[Ca^{2+}]_i$  oscillations in response to SST (green) and SST+TPQ (blue;  $n$ =islets from 4 mice). (Q) Average C57 islet  $[Ca^{2+}]_i$  plateau fraction with 20G+Tolb (white), after SST (green), and after SST+TPQ (blue;  $n$ =islets from 4 mice; \* $P<0.05$ , \*\*\* $P<0.001$ , and \*\*\*\* $P<0.0001$ ). Statistical analysis was conducted using paired two-sample t-tests (B-G, L, and M), unpaired two-sample t-tests (I, J, and P), or one-way ANOVA (N and Q); uncertainty is expressed as mean  $\pm$  SEM.

**Fig. 2: SST-induced activation of  $\beta$ -cell NKAs generates islet  $[Ca^{2+}]_i$  and  $[cAMP]_i$  oscillations.** (A) Representative C57 islet jRGECO1a  $[Ca^{2+}]_i$  (top, red) and cAMP<sub>r</sub>  $[cAMP]_i$  (bottom, blue) responses to 200nM SST and 150 $\mu$ M ouabain (Oua) in the presence of 20G+1mM Tolb. Heatmaps illustrating typical islet  $[Ca^{2+}]_i$  (middle, upper) and  $[cAMP]_i$  (middle, lower) responses from a single experiment. (B) Representative C57 islet jRGECO1a  $[Ca^{2+}]_i$  and cAMP<sub>r</sub>  $[cAMP]_i$  responses to 200nM SST, 150 $\mu$ M Oua, and 125 $\mu$ M diazoxide (DZ) in the presence of 20G. Heatmaps illustrating typical islet  $[Ca^{2+}]_i$  and  $[cAMP]_i$  responses from a single experiment. (C) Average percentage of C57 islets with 20G+1mM Tolb displaying  $[Ca^{2+}]_i$  oscillations in response to SST (green;  $n$ =islets from 7 mice), SST+Oua (light blue;  $n$ =islets from 3 mice), and SST+0mM  $K^+$  (0  $[K^+]$ ; orange;  $n$ =islets from 4 mice; \*\*\* $P<0.001$ ). (D) Average C57 islet  $[Ca^{2+}]_i$  plateau fraction with 20G+Tolb (white;  $n$ =islets from 10 mice), with 20G+SST (yellow;  $n$ =islets from 6 mice), and with 20G+Tolb+SST (green;  $n$ =islets from 4 mice; \* $P<0.05$  and \*\*\*\* $P<0.0001$ ). (E) Average C57 islet  $[Ca^{2+}]_i$  area under the curve (AUC; averaged over at least 10 minutes) normalized to 20G+0  $[K^+]$  before (light blue;  $n$ =islets from 4 mice) and after DZ (black;  $n$ =islets from 4 mice; \*\* $P<0.01$ ). (F) Cross-correlation analysis of C57 islet  $[Ca^{2+}]_i$  and  $[cAMP]_i$  ( $n$ =islets from 4 mice). (G) Representative C57 islet jRGECO1a  $[Ca^{2+}]_i$  (top, red) response to 200nM SST and 5mM  $K^+$  (5  $[K^+]$ ) in the presence of 20G+0  $[K^+]$ . Heatmap illustrating typical islet  $[Ca^{2+}]_i$  responses (bottom) from a single experiment. (H) Representative  $\beta$ -cell  $V_m$  recording from an intact mouse islet. Whole-cell  $\beta$ -cell currents were measured in response to a voltage ramp protocol after treatment with (1) 20G+1mM Tolb, (2) 20G+1mM Tolb+0  $[K^+]$ , and (3) 20G+1mM Tolb+0  $[K^+]$ +200nM SST. (I) Average C57  $\beta$ -cell currents with 20G+1mM Tolb (white), after 0  $[K^+]$  (light blue), and after 0  $[K^+]$ +SST (orange;  $n=10$   $\beta$ -cells in intact islets). (J) Average 0  $[K^+]$ -induced (light blue) and 0

[K<sup>+</sup>]+SST-induced C57  $\beta$ -cell currents (orange;  $n=10$   $\beta$ -cells in intact islets). (K) Average C57  $\beta$ -cell  $V_m$  with 20G+Tolb (white;  $n=10$   $\beta$ -cells in intact islets), after 0 [K<sup>+</sup>] (light blue; 9  $\beta$ -cells in intact islets), and after 0 [K<sup>+</sup>]+SST (orange;  $n=6$   $\beta$ -cells in intact islets). Statistical analysis was conducted using paired two-sample t-tests (I and J), unpaired two-sample t-tests (E), or one-way ANOVA (C, D, and K); uncertainty is expressed as mean  $\pm$  SEM.

**Fig. 3: NKA-mediated islet [Ca<sup>2+</sup>]<sub>i</sub> oscillations are inhibited by forskolin-induced increases in [cAMP]<sub>i</sub>.** (A) Representative C57 islet ING-2 [Na<sup>+</sup>]<sub>i</sub> (top, dark green) and Fura Red AM [Ca<sup>2+</sup>]<sub>i</sub> (bottom, red) responses to 200nM SST in the presence of 20G+1mM Tolb. Heatmaps illustrating typical islet [Na<sup>+</sup>]<sub>i</sub> (middle, upper) and [Ca<sup>2+</sup>]<sub>i</sub> (middle, lower) responses from a single experiment. (B) Cross-correlation analysis of C57 islet [Na<sup>+</sup>]<sub>i</sub> and [Ca<sup>2+</sup>]<sub>i</sub> with 20G+Tolb+SST ( $n$ =islets from 4 mice). (C) Representative C57 islet ING-2 [Na<sup>+</sup>]<sub>i</sub> and Fura Red [Ca<sup>2+</sup>]<sub>i</sub> responses to 9mM G (9G). Heatmaps illustrating typical islet [Na<sup>+</sup>]<sub>i</sub> and [Ca<sup>2+</sup>]<sub>i</sub> responses from a single experiment. (D) Cross-correlation analysis of C57 islet [Na<sup>+</sup>]<sub>i</sub> and [Ca<sup>2+</sup>]<sub>i</sub> with 9G ( $n$ =islets from 3 mice). Representative  $\beta$ -cell  $V_m$  recording from an intact mouse islet. Whole-cell  $\beta$ -cell currents were measured in response to a voltage ramp protocol after treatment with (1) 20G+1mM Tolb, (2) 20G+1mM Tolb+5 $\mu$ M forskolin (FSK), and (3) 20G+1mM Tolb+5 $\mu$ M FSK+200nM SST. (F) Average C57  $\beta$ -cell currents with 20G+1mM Tolb (white), after FSK (purple), and after FSK+SST (light orange;  $n=11$   $\beta$ -cells in intact islets). (G) Average FSK-induced (purple) and FSK+SST-induced C57  $\beta$ -cell currents (light orange;  $n=11$   $\beta$ -cells in intact islets). (H) Average C57  $\beta$ -cell  $V_m$  with 20G+Tolb (white), after FSK (purple), and after FSK+SST (light orange;  $n=11$   $\beta$ -cells in intact islets). (I) Representative normalized ( $F/F_{min}$ ) C57 islet Fura-2 Ca<sup>2+</sup> responses to 200nM SST and 5 $\mu$ M FSK in the presence of 20G+1mM Tolb. (J) Average percentage of C57 islets with 20G+Tolb displaying [Ca<sup>2+</sup>]<sub>i</sub> oscillations in response to SST (green) and SST+FSK (light orange;  $n$ =islets from 4 mice). (K) Average C57 islet [Ca<sup>2+</sup>]<sub>i</sub> plateau fraction with 20G+Tolb before (white), after SST (green), and after SST+FSK (light orange;  $n$ =islets from 4 mice; \* $P$ <0.05 and \*\*\*\* $P$ <0.0001). Statistical analysis was conducted using paired two-sample t-tests (F and G), unpaired two-sample t-tests (J), or one-way ANOVA (H and K); uncertainty is expressed as mean  $\pm$  SEM.

**Fig. 4: Activation of  $\beta$ -cell NKAs is a conserved mechanism for G<sub>i/o</sub>-coupled GPCR control of islet Ca<sup>2+</sup> handling;** (A) Representative normalized ( $F/F_{min}$ ) C57 islet Fura-2 Ca<sup>2+</sup> responses to 200nM clonidine (Clon) and 150 $\mu$ M Oua in the presence of 20G+1mM Tolb. (B) Average percentage of C57 islets with 20G+Tolb displaying [Ca<sup>2+</sup>]<sub>i</sub> oscillations in response to Clon (orange) and Clon+Oua (light blue;  $n$ =islets from 3 mice). (C) Average C57 islet [Ca<sup>2+</sup>]<sub>i</sub> plateau fraction with 20G+Tolb (white), after Clon (orange), and after Clon+Oua (light blue;  $n$ =islets from 3 mice; \*\*\*\* $P$ <0.0001). (D) Representative normalized ( $F/F_{min}$ ) Fura-2 Ca<sup>2+</sup> responses of C57 islets transduced with RIP-G<sub>i</sub> DREADD LVs to 10 $\mu$ M CNO and 150 $\mu$ M Oua in the presence of 20G+1mM Tolb. (E) Average percentage of C57 islets transduced with RIP-G<sub>i</sub> DREADD LVs with 20G+Tolb displaying [Ca<sup>2+</sup>]<sub>i</sub> oscillations in response to CNO (light pink) and CNO+Oua (light blue;  $n$ =islets from 3 mice; \*\* $P$ <0.01). (F) Average C57 islet [Ca<sup>2+</sup>]<sub>i</sub> plateau fraction transduced with RIP-G<sub>i</sub> DREADD LVs with 20G+Tolb (white), after CNO (light pink), and after CNO+Oua (light blue;  $n$ =islets from 3 mice; \*\*\*\* $P$ <0.0001). (G) Representative normalized ( $F/F_{min}$ )  $\delta$ G<sub>i</sub> DREADD islet Cal-590 Ca<sup>2+</sup> responses to 10 $\mu$ M CNO and 200nM SST in the presence of 9mM glucose (9G). (H) Average  $\delta$ G<sub>i</sub> DREADD islet [Ca<sup>2+</sup>]<sub>i</sub> oscillation period relative to before treatment (dark pink;  $n$ =islets from 7 mice) following CNO (light pink;  $n$ =islets from 7 mice) and CNO+SST (green;  $n$ =islets from 4 mice; \*\* $P$ <0.01 and \*\*\* $P$ <0.001). (I) Average  $\delta$ G<sub>i</sub> DREADD islet [Ca<sup>2+</sup>]<sub>i</sub> AUC (sum of 15 minutes) relative to before treatment (dark pink), after CNO (light pink), and after CNO+SST (green;  $n$ =islets from 4 mice; \* $P$ <0.05 and \*\* $P$ <0.01). (J) Average insulin secretion from  $\delta$ G<sub>i</sub> DREADD islets without CNO (dark pink) and with CNO (light pink) at 2mM glucose (2G;  $n$ =islets from 3 mice), 7mM glucose (7G;  $n$ =islets from 3 mice), and 9G ( $n$ =islets from 6 mice; \*\*\* $P$ <0.001). (K) Average SST secretion from  $\delta$ G<sub>i</sub> DREADD islets without CNO (dark pink) and with CNO (light pink) at 9G ( $n$ =islets from 3 mice; \*\* $P$ <0.01). (L) Average insulin secretion from C57 islets without CNO (white) and with CNO (light pink) at 1mM glucose (1G;  $n$ =islets from 3 mice) and at 11mM glucose (11G;  $n$ =islets from 3 mice). (M) Representative normalized ( $F/F_{min}$ ) human  $\beta$ -cell jRGECO1a [Ca<sup>2+</sup>]<sub>i</sub> responses (within intact human islets) to 400nM SST in the presence of 7G. (N) Average human  $\beta$ -cell [Ca<sup>2+</sup>]<sub>i</sub> AUC (averaged over at least 15 minutes) with 7G before (white) and after SST (green;  $n$ =islets from 4 healthy donors; \* $P$ <0.05). (O) Average human  $\beta$ -cell [Ca<sup>2+</sup>]<sub>i</sub> plateau fraction (within intact human islets) with 7G before (white) and



after SST (green;  $n$ =islets from 4 healthy donors;  $**P<0.01$ ). Statistical analysis was conducted using unpaired two-sample t-tests (B, E, K, N, and O), or one-way ANOVA (C, F, H-J, and L); uncertainty is expressed as mean  $\pm$  SEM.

**Fig. 5:  $G_{i/o}$ -coupled GPCRs regulate human  $\beta$ -cell electrical excitability by stimulating NKA activity:**

(A) Top row: Representative immunofluorescent staining of healthy human pancreatic sections for NKA  $\alpha 1$  subunits (green), insulin (red), and a merged image of the two showing colocalization (yellow). Bottom row: Magnification of the corresponding areas outlined with yellow boxes above. (B) Representative human islet Cal-590  $Ca^{2+}$  responses to 400nM SST in the presence of 20G+1mM Tolb with (top) and without extracellular  $K^+$  (0 [ $K^+$ ]; bottom). (C) Average maximum SST-induced decrease in human islet [ $Ca^{2+}$ ]<sub>i</sub> relative to before treatment with (green) and without extracellular  $K^+$  (red;  $n$ =human islets from 5 healthy donors;  $*P<0.05$ ). (D) Average SST-induced decrease in human islet [ $Ca^{2+}$ ]<sub>i</sub> AUC (sum of 5 minutes) relative to before treatment with (green) and without extracellular  $K^+$  (red;  $n$ =human islets from 5 healthy donors;  $*P<0.05$ ). (E) Representative  $\beta$ -cell  $V_m$  recording from an intact human islet. Whole-cell human  $\beta$ -cell currents were measured in response to a voltage ramp protocol after treatment with (1) 20G+1mM Tolb and (2) 20G+1mM Tolb+400nM SST. (F) Average human  $\beta$ -cell  $V_m$  with 20G+Tolb before (white) and after SST (green;  $n=7$   $\beta$ -cells in intact human islets;  $**P<0.01$ ). (G) Average normalized ( $I/I_{min}$ ) human  $\beta$ -cell currents with 20G+1mM Tolb before (white) and after SST (green;  $n=8$   $\beta$ -cells in intact human islets;  $****P<0.0001$ );  $I_{min}$  is defined as the minimum current measured before SST. (H) Average normalized ( $I/I_{min}$ ) human  $\beta$ -cell currents with 20G+1mM Tolb+0 [ $K^+$ ] before (white) and after SST (red;  $n=5$   $\beta$ -cells in intact human islets). (I) Average SST-induced human  $\beta$ -cell currents with (green;  $n=8$   $\beta$ -cells in intact human islets;  $****P<0.0001$ ) and without extracellular  $K^+$  (red;  $n=5$   $\beta$ -cells in intact islets). Statistical analysis was conducted using unpaired two-sample t-tests (C and D) or paired two-sample t-tests (F-I); uncertainty is expressed as mean  $\pm$  SEM.

**Fig. 6:  $G_{i/o}$ -coupled GPCR-mediated activation of  $\beta$ -cell NKAs is controlled by PKA and tyrosine kinase signaling:**

(A) Representative normalized ( $F/F_{min}$ ) C57 islet Fura-2  $Ca^{2+}$  responses to 200nM SST, 10 $\mu$ M H89, and 5 $\mu$ M FSK in the presence of 20G+1mM Tolb. (B) Average C57 islet [ $Ca^{2+}$ ]<sub>i</sub> AUC (averaged over at least 5 minutes) with 20G+Tolb (white), SST (green), SST+H89 (light blue), and SST+H89+FSK (light orange;  $n$ =islets from 3 mice;  $**P<0.01$  and  $***P<0.001$ ). (C) Average C57 islet [ $Ca^{2+}$ ]<sub>i</sub> plateau fraction with 20G+Tolb (white), after SST (green), after SST+H89 (light blue), and after SST+H89+FSK (light orange;  $n$ =islets from 3 mice;  $****P<0.0001$ ). (D) Representative normalized ( $F/F_{min}$ ) C57 islet Fura-2  $Ca^{2+}$  responses to 200nM SST and 100nM dasatinib (Dasa) in the presence of 20G+1mM Tolb. Insets indicate the percentage of C57 islets exhibiting each type of Dasa [ $Ca^{2+}$ ]<sub>i</sub> response. (E) Average percentage of C57 islets with 20G+Tolb displaying [ $Ca^{2+}$ ]<sub>i</sub> oscillations in response to SST (green) and SST+Dasa (purple;  $n$ =islets from 3 mice;  $**P<0.01$ ). (F) Average C57 islet [ $Ca^{2+}$ ]<sub>i</sub> plateau fraction with 20G+Tolb after SST (green) and after SST+Dasa (purple;  $n$ =islets from 3 mice;  $***P<0.001$ ). (G) Representative normalized ( $F/F_{min}$ ) C57 islet Fura-2  $Ca^{2+}$  responses to 200nM SST and 5 $\mu$ M NSC 87877 in the presence of 20G+1mM Tolb. Insets indicate the percentage of C57 islets exhibiting each type of NSC 87877 [ $Ca^{2+}$ ]<sub>i</sub> response. (H) Average percentage of C57 islets with 20G+Tolb displaying [ $Ca^{2+}$ ]<sub>i</sub> oscillations in response to SST (green) and SST+NSC 87877 (pink;  $n$ =islets from 3 mice;  $**P<0.01$ ). (I) Average C57 islet [ $Ca^{2+}$ ]<sub>i</sub> plateau fraction with 20G+Tolb after SST (green) and after SST+NSC 87877 (pink;  $n$ =islets from 3 mice;  $**P<0.01$ ). (J) Representative normalized ( $F/F_{min}$ ) C57 islet Fura-2  $Ca^{2+}$  responses to 1 $\mu$ M insulin and 100nM Dasa in the presence of 20G+1mM Tolb. (K) Average percentage of C57 islets with 20G+Tolb displaying [ $Ca^{2+}$ ]<sub>i</sub> oscillations in response to insulin (red) and insulin+Dasa (purple;  $n$ =islets from 3 mice). (L) Average C57 islet [ $Ca^{2+}$ ]<sub>i</sub> plateau fraction with 20G+Tolb after insulin (red) and after insulin+Dasa (purple;  $n$ =islets from 3 mice;  $**P<0.01$ ). (M) Immunoblots (IBs) of cell lysates isolated from nontreated C57 islets as well as from islets treated with 200nM SST or 1 $\mu$ M insulin for 15 minutes. IBs were probed for total NKA (ATP1A1), NKA phosphorylated at Y10 (p-ATP1A1<sup>Y10</sup>), and NKA phosphorylated at Y260 (p-ATP1A1<sup>Y260</sup>). Bands corresponding to p-ATP1A1<sup>Y10</sup> and p-ATP1A1<sup>Y260</sup> were normalized to total ATP1A1 bands; p-ATP1A1<sup>Y10</sup> and p-ATP1A1<sup>Y260</sup> bands from islets with SST and insulin were then normalized to nontreated islets (shown below IBs). Statistical analysis was conducted using unpaired two-sample t-tests (E, F, H, I, and K) or one-way ANOVA (B, C, and L); uncertainty is expressed as mean  $\pm$  SEM.

**Fig. 7: Model illustrating the mechanisms that regulate  $\beta$ -cell NKA function.** (A) Overview of stimulatory and inhibitory receptor-mediated signaling pathways that tune  $\beta$ -cell NKA activity.  $G_{i/o}$ -coupled GPCR signaling transiently hyperpolarizes  $\beta$ -cell  $V_m$  via Src-mediated phosphorylation of NKAs as well as by decreasing  $[cAMP]_i$  and PKA activity. Other tyrosine kinases (e.g. insulin receptors) also phosphorylate and activate  $\beta$ -cell NKAs. Stimulation of  $G_s$ -coupled GPCRs is predicted to limit  $\beta$ -cell NKA function by increasing  $[cAMP]_i$  and PKA activity. This figure was created with BioRender.com.

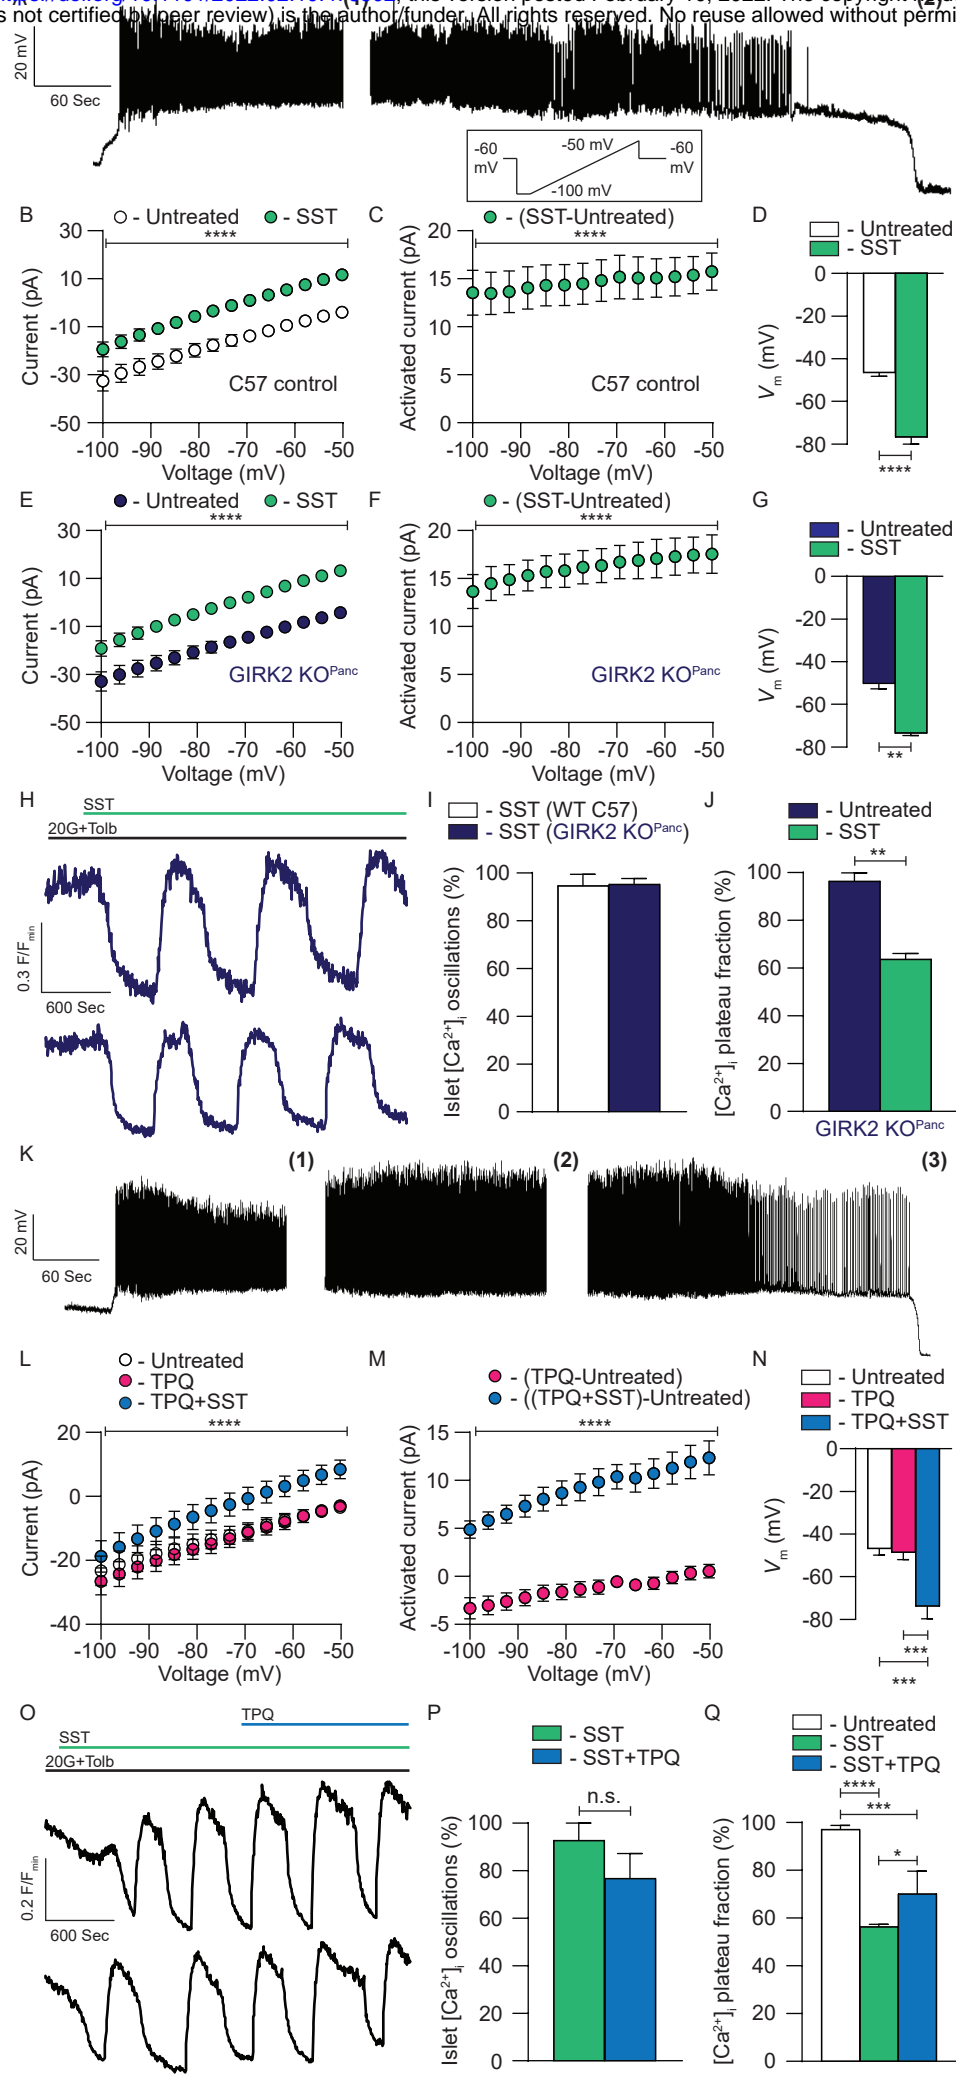

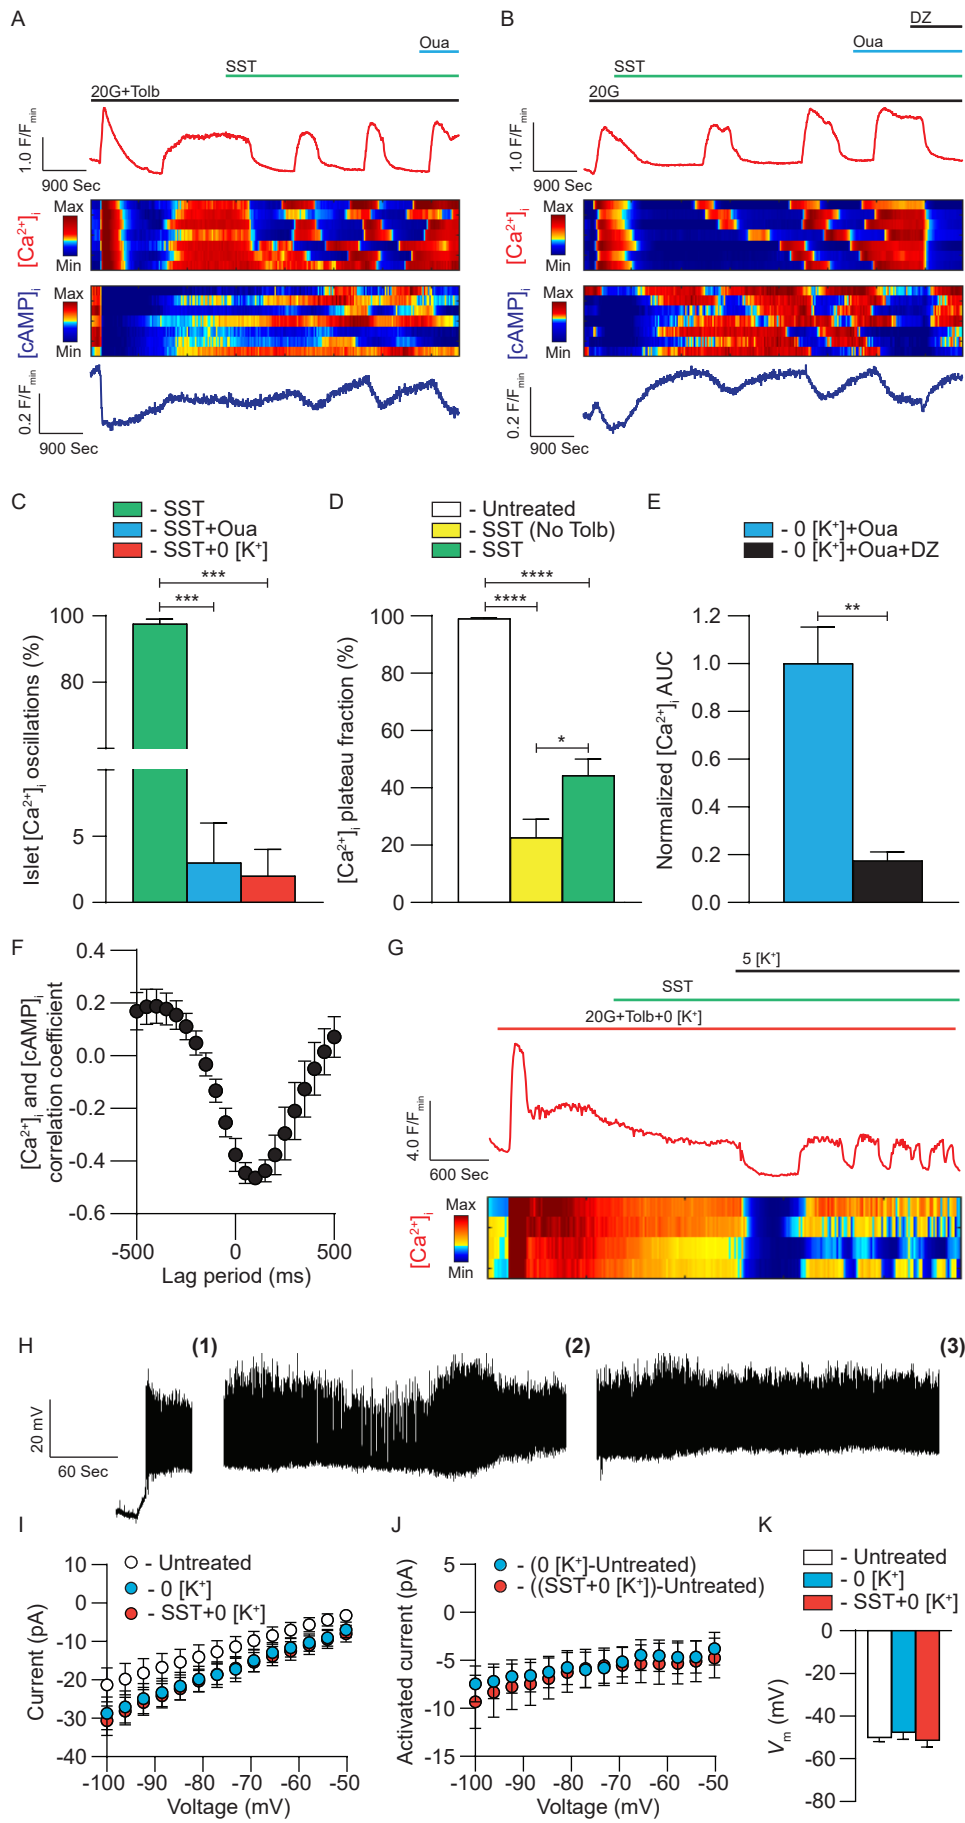

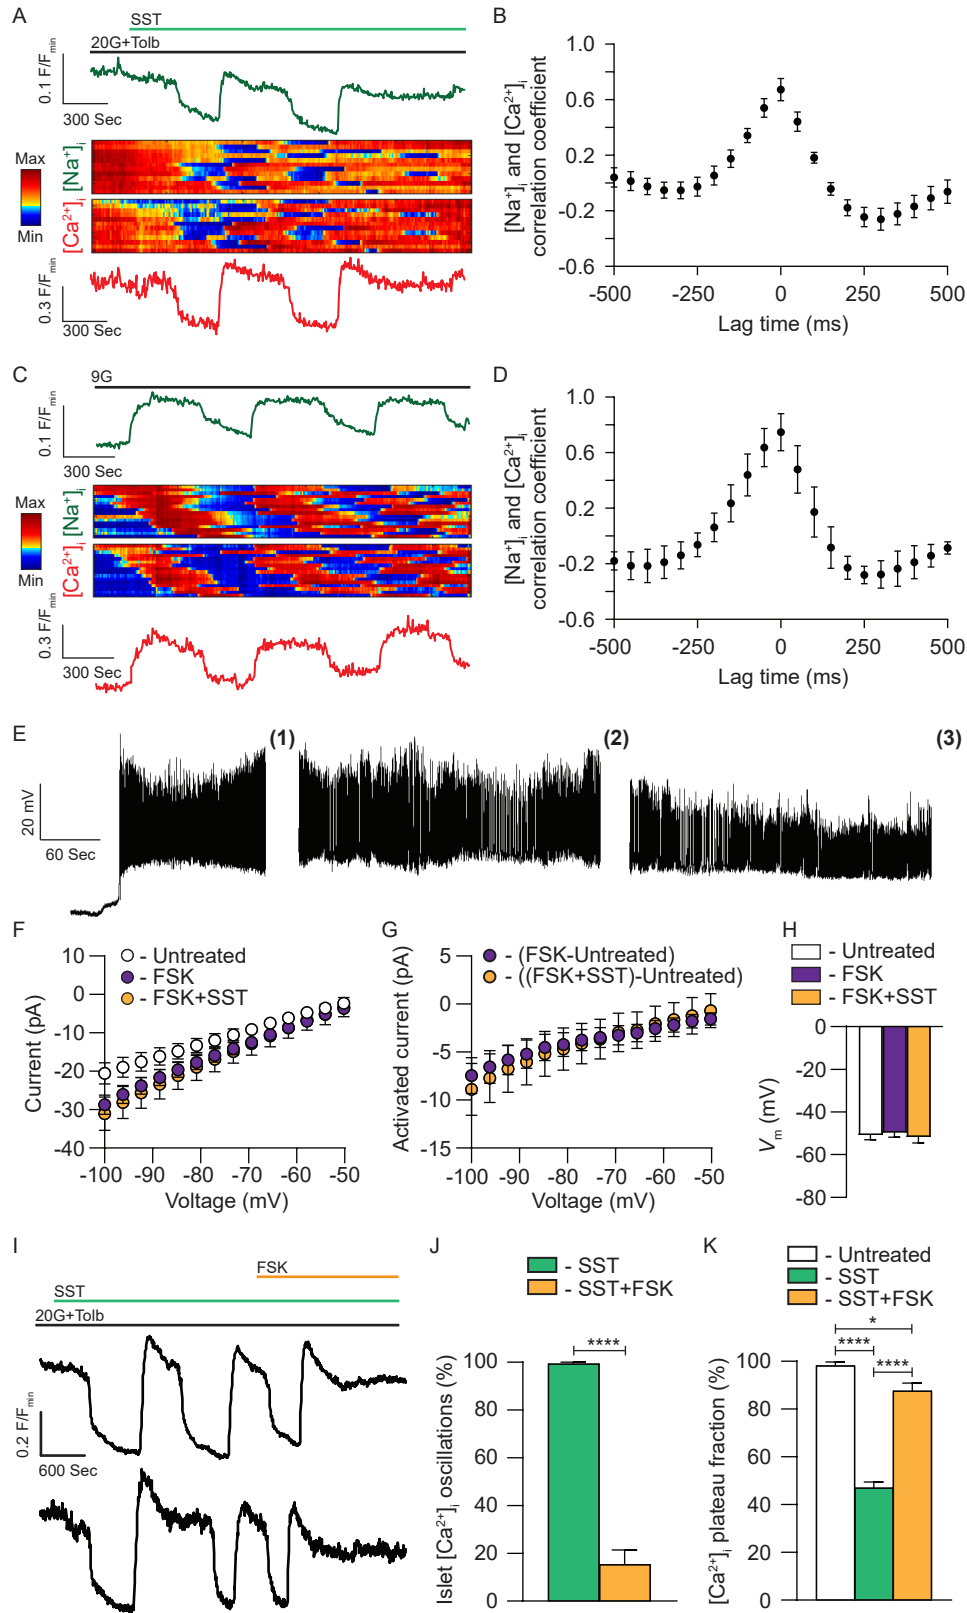

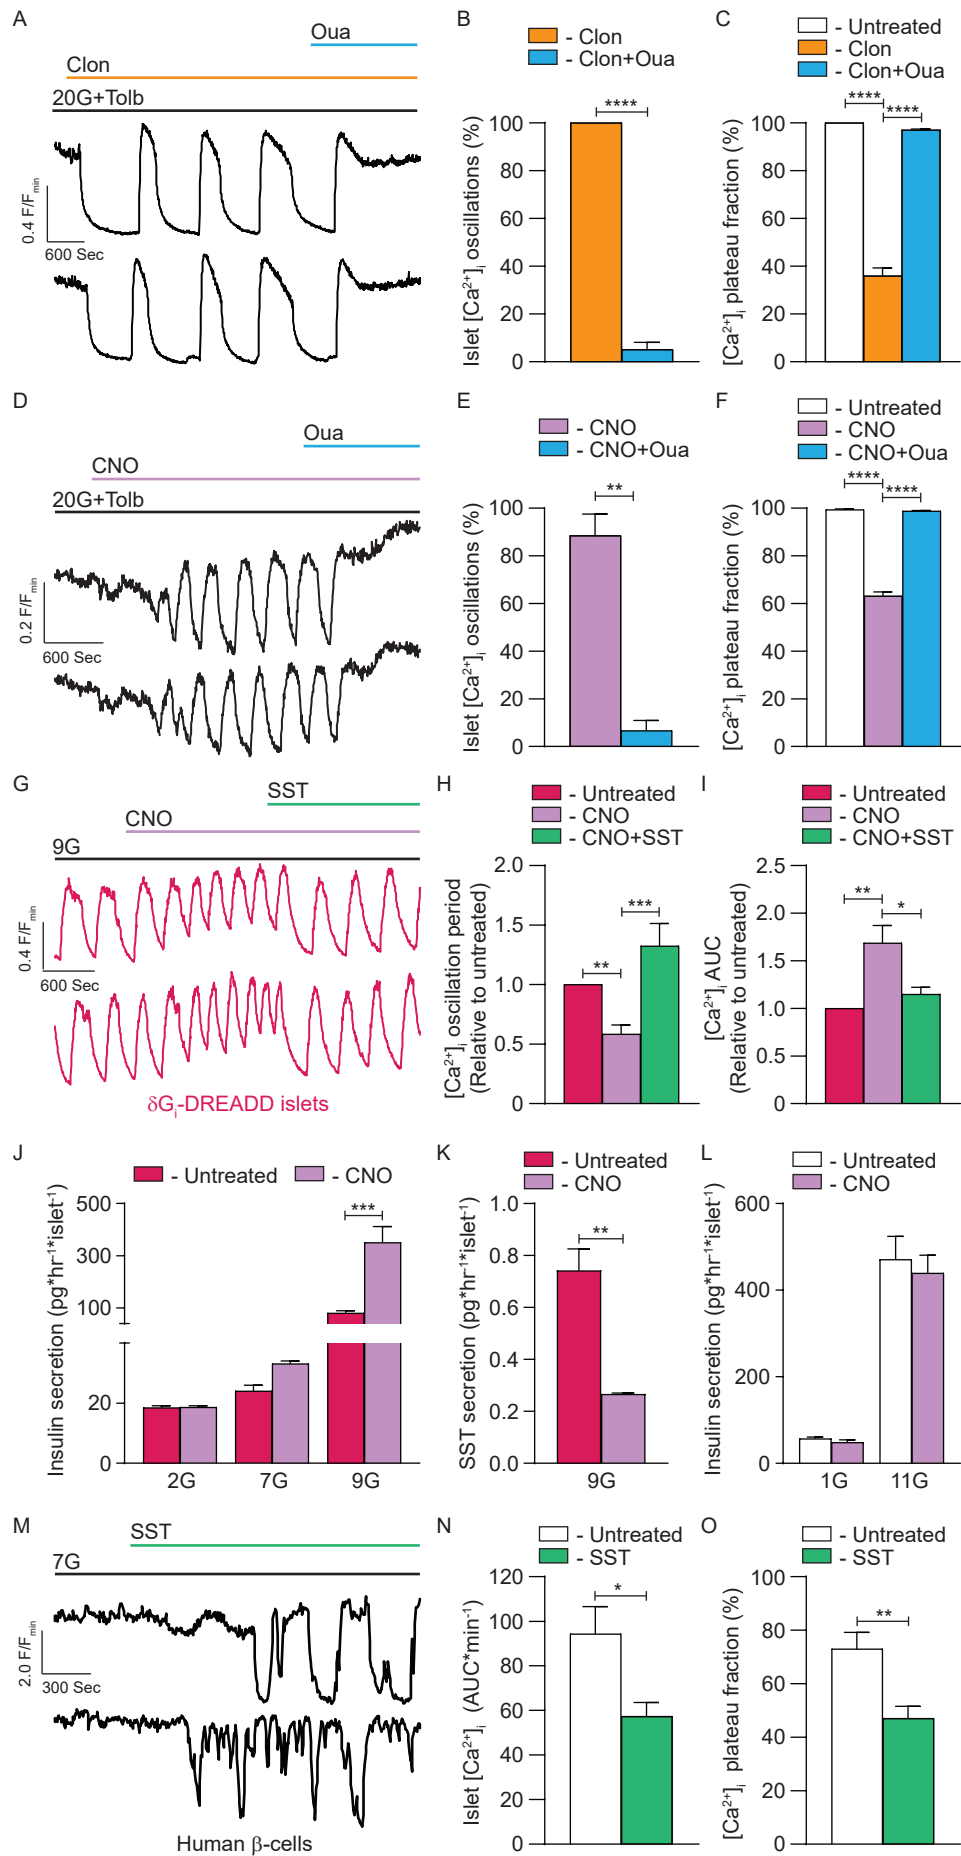

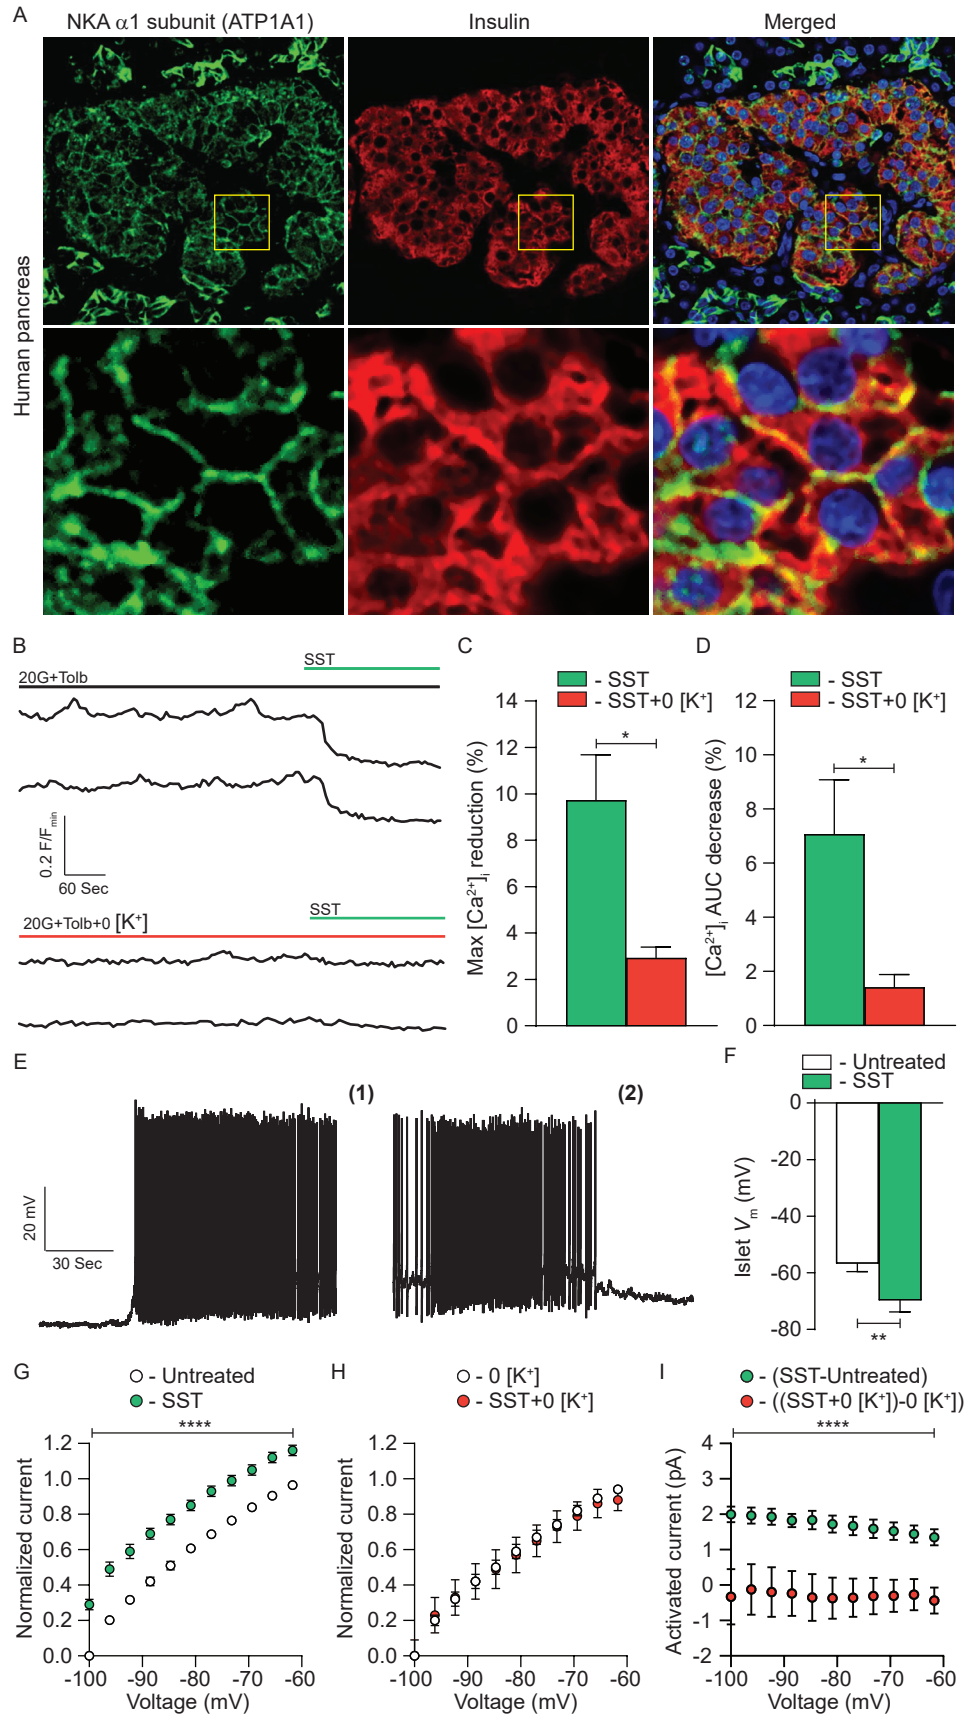

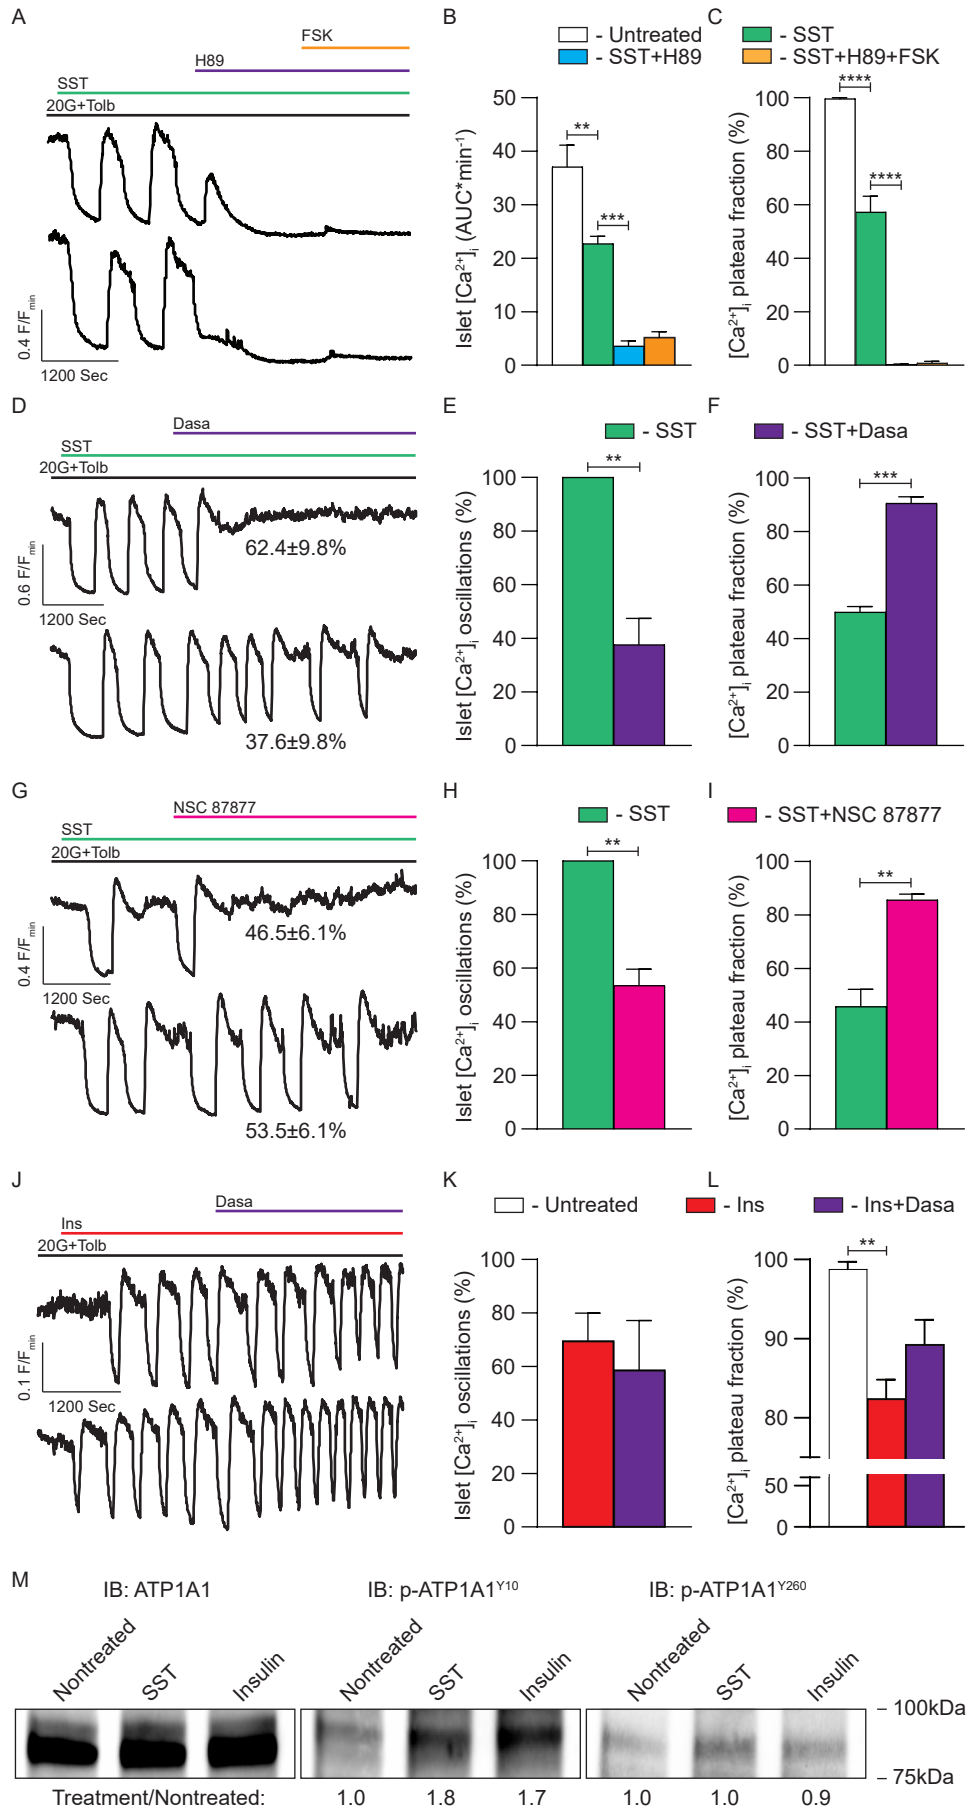



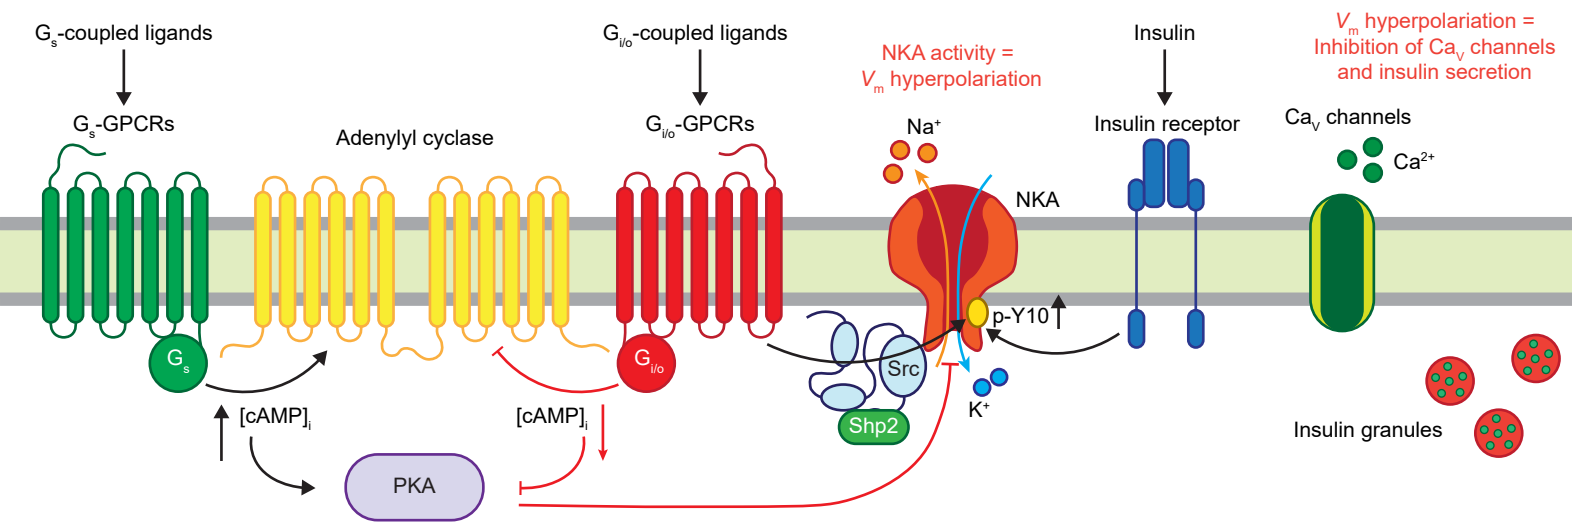

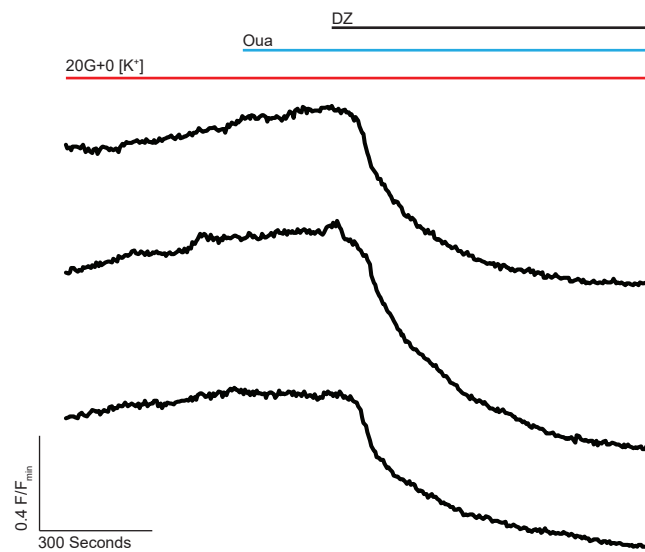

**Fig. S1: K<sub>ATP</sub> channel activation can hyperpolarize  $\beta$ -cell  $V_m$  when NKAs are inactive.** Representative normalized ( $F/F_{min}$ ) Fura-2 Ca<sup>2+</sup> responses to 125 $\mu$ M DZ in the presence of 0 [K<sup>+</sup>] and 125 $\mu$ M Oua ( $n$ =islets from 3 mice). Data analysis is presented in Fig. 2E.
